# Supplementary material for: Single-cell RNA sequencing reveals immunosuppressive pathways associated with metastatic breast cancer
Source: bioRxiv or medRxiv preprint supplement (doi:10.1101/2024.09.25.24314388), 2024-09-26

Primary 1

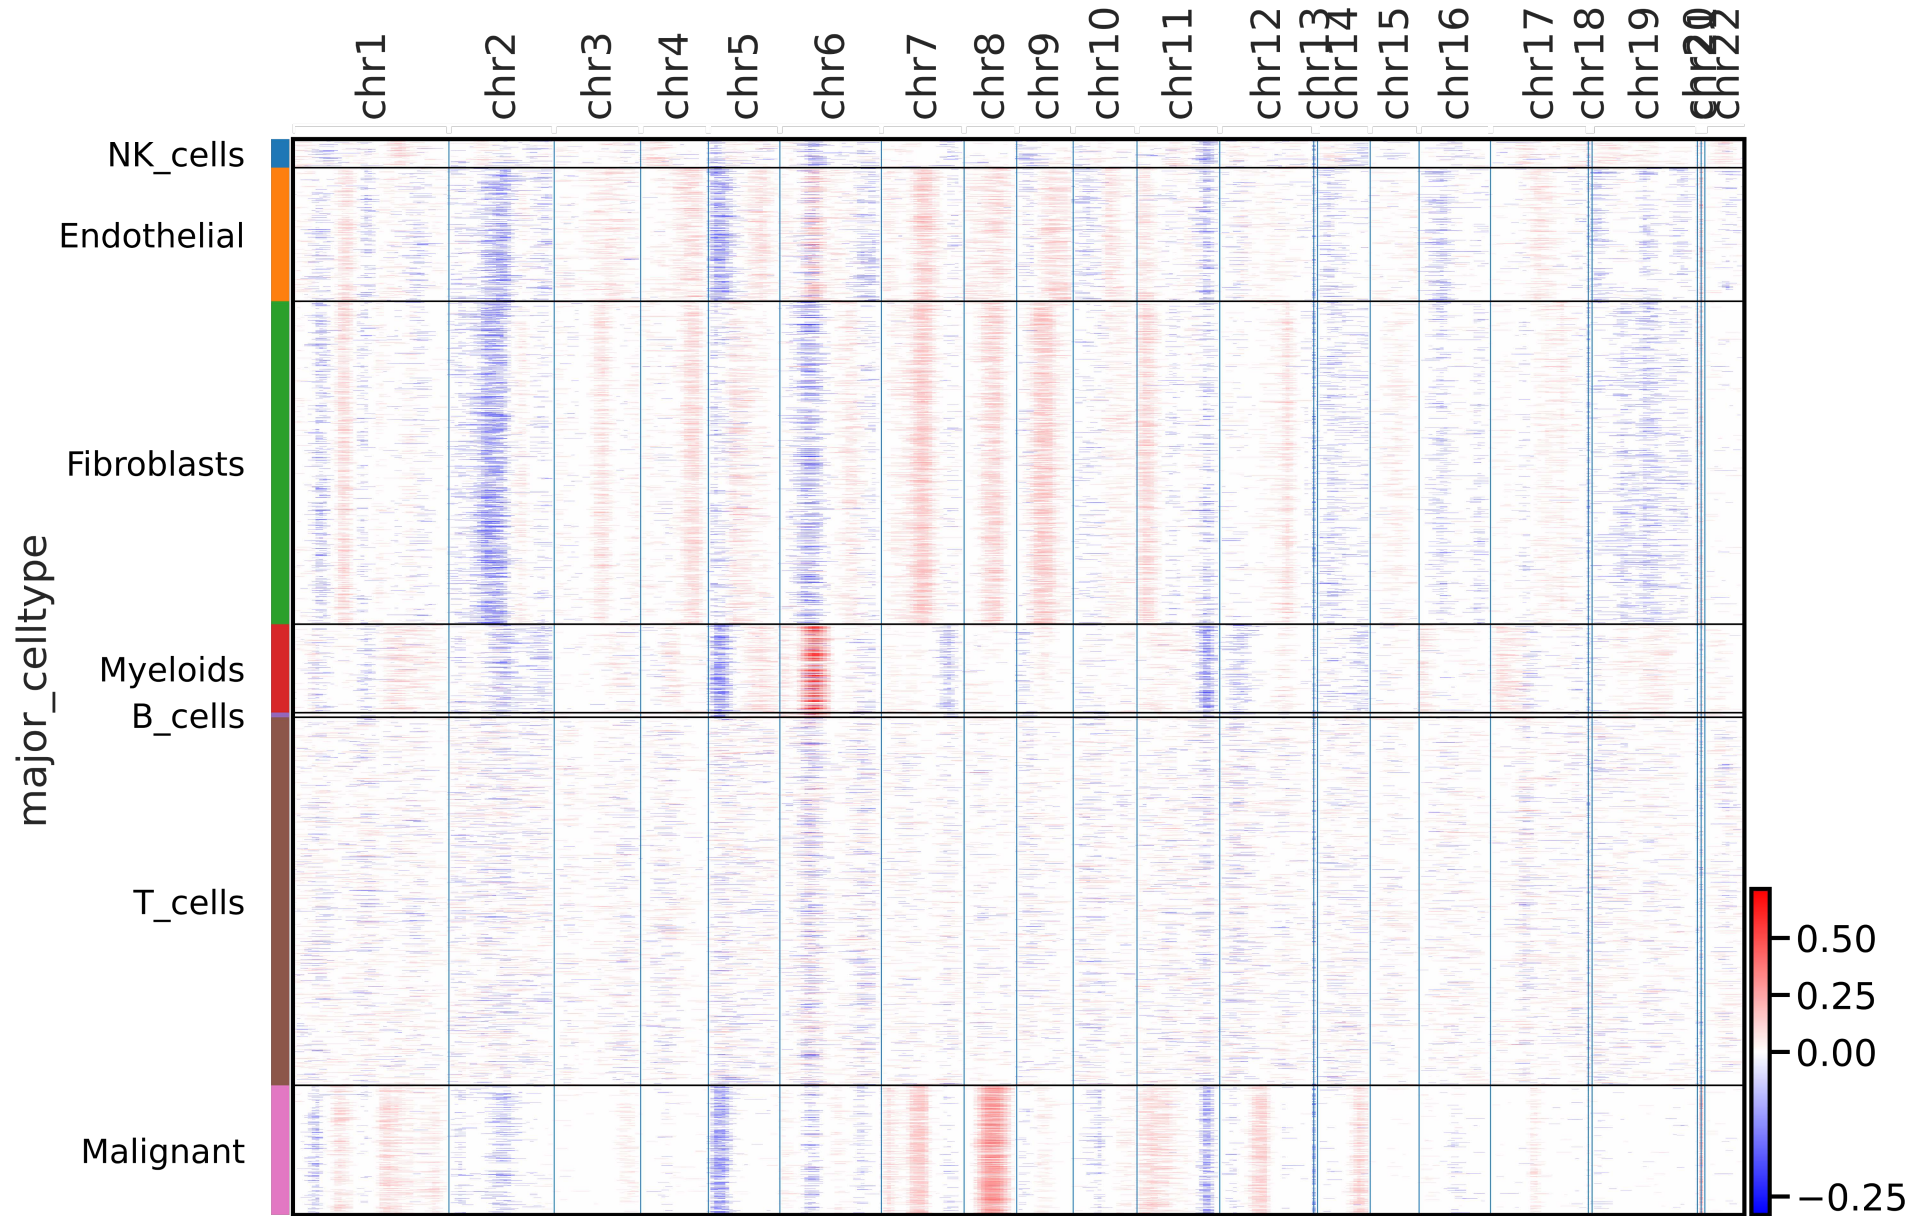

Primary 2

major\_celltype

Endothelial  
Fibroblasts  
T\_cells

Malignant

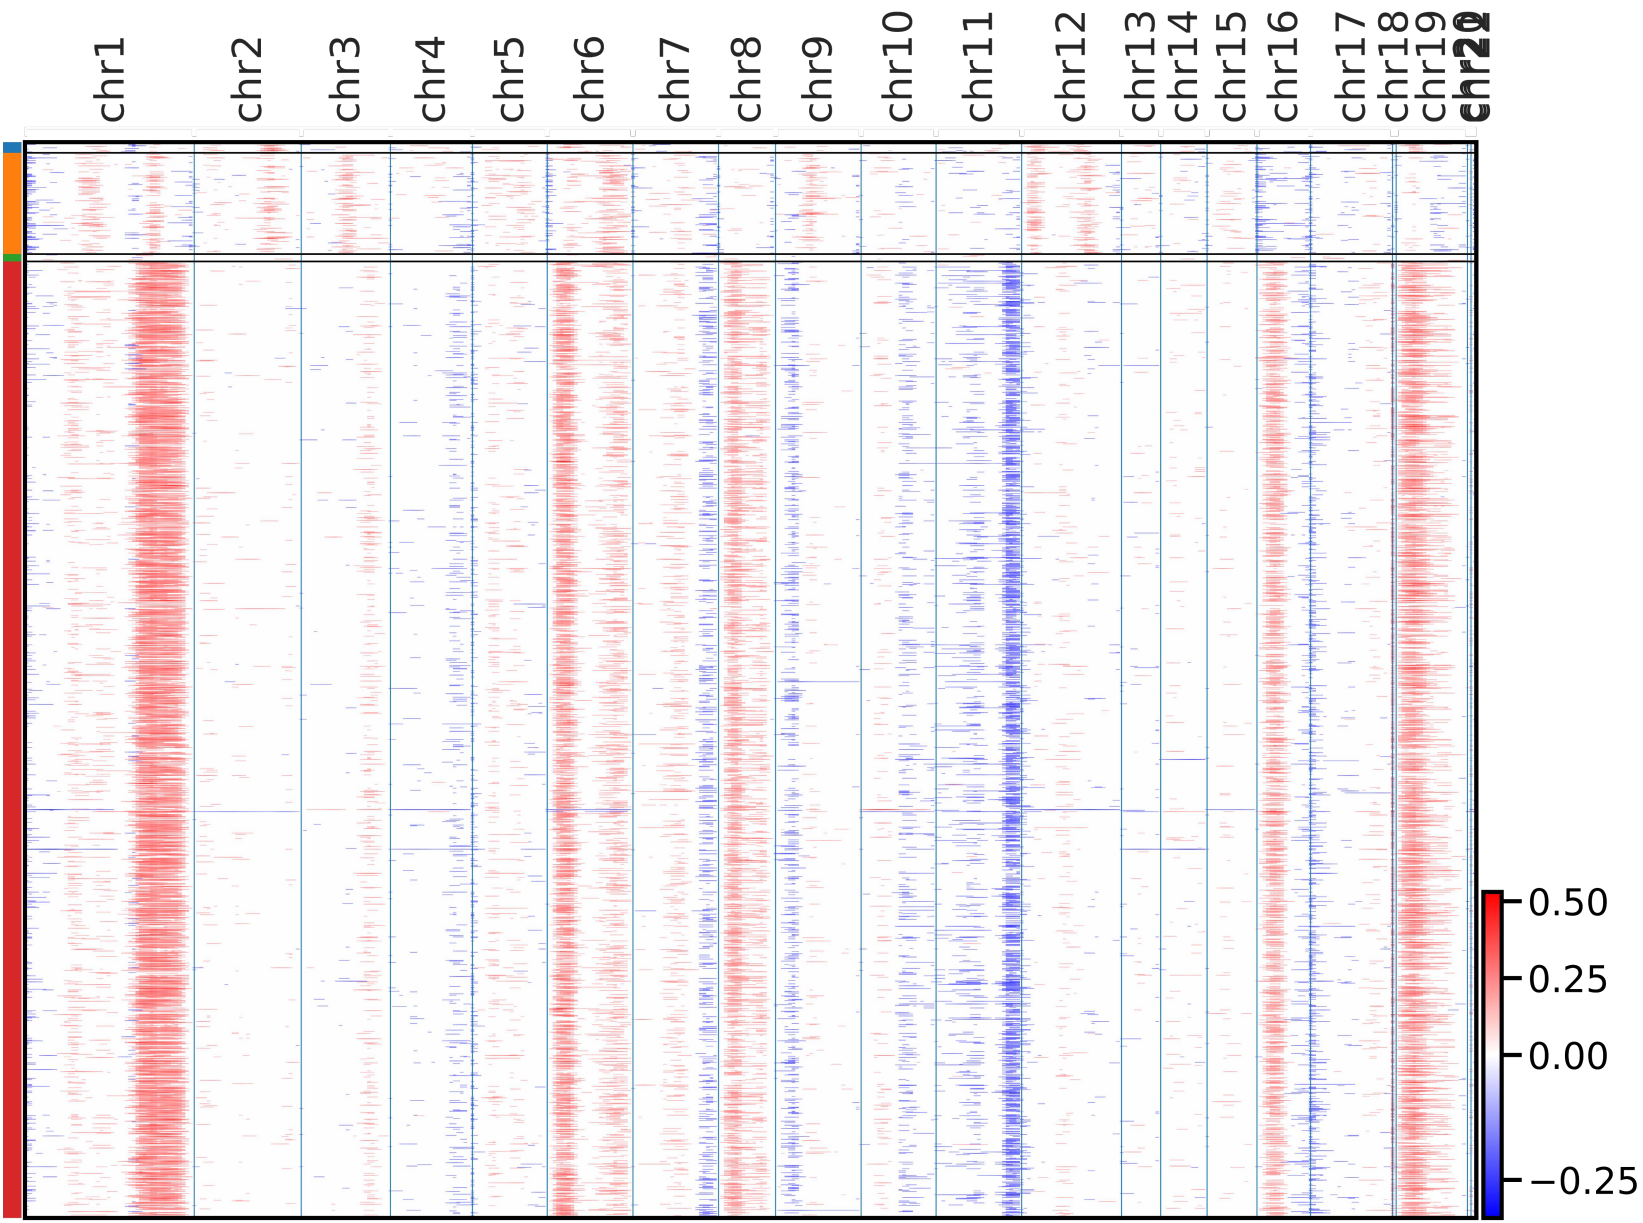



Primary 3

major\_celltype

Fibroblasts

Myeloids

T\_cells

Malignant

chr1

chr2

chr3

chr4

chr5

chr6

chr7

chr8

chr9

chr10

chr11

chr12

chr13

chr14

chr15

chr16

chr17

chr18

chr19

chr20

chr21

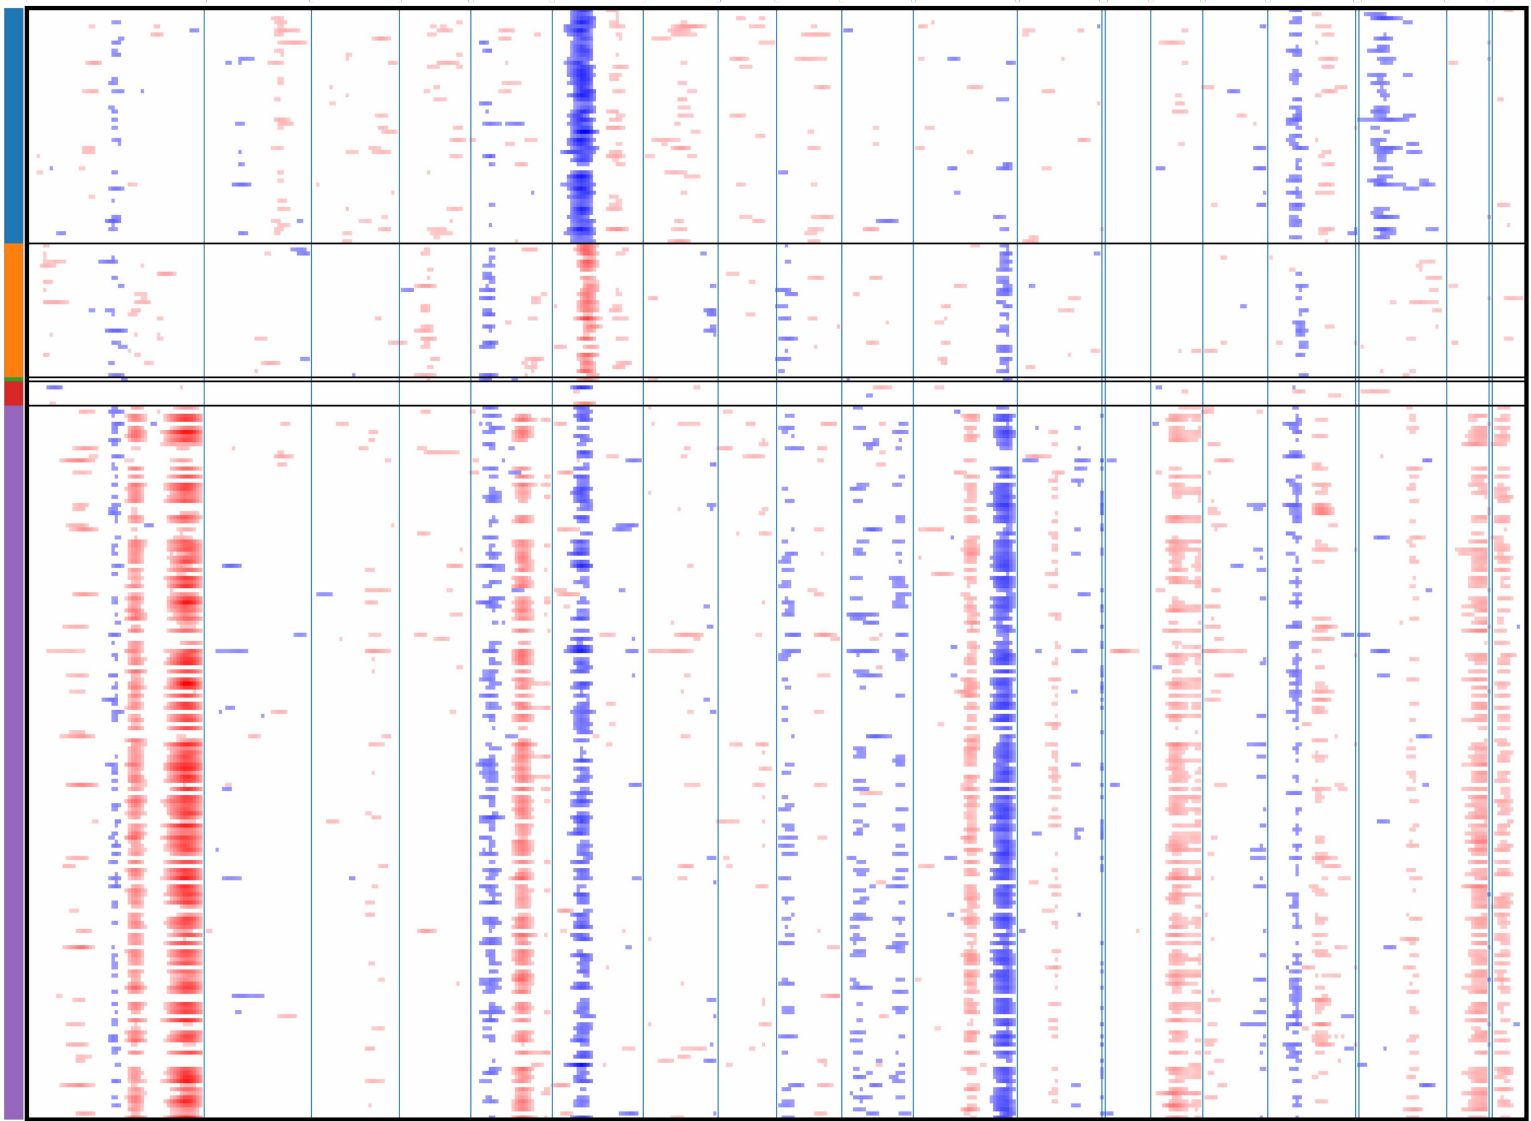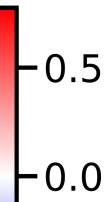

Primary 4

Myeloids

major\_celltype  
Malignant

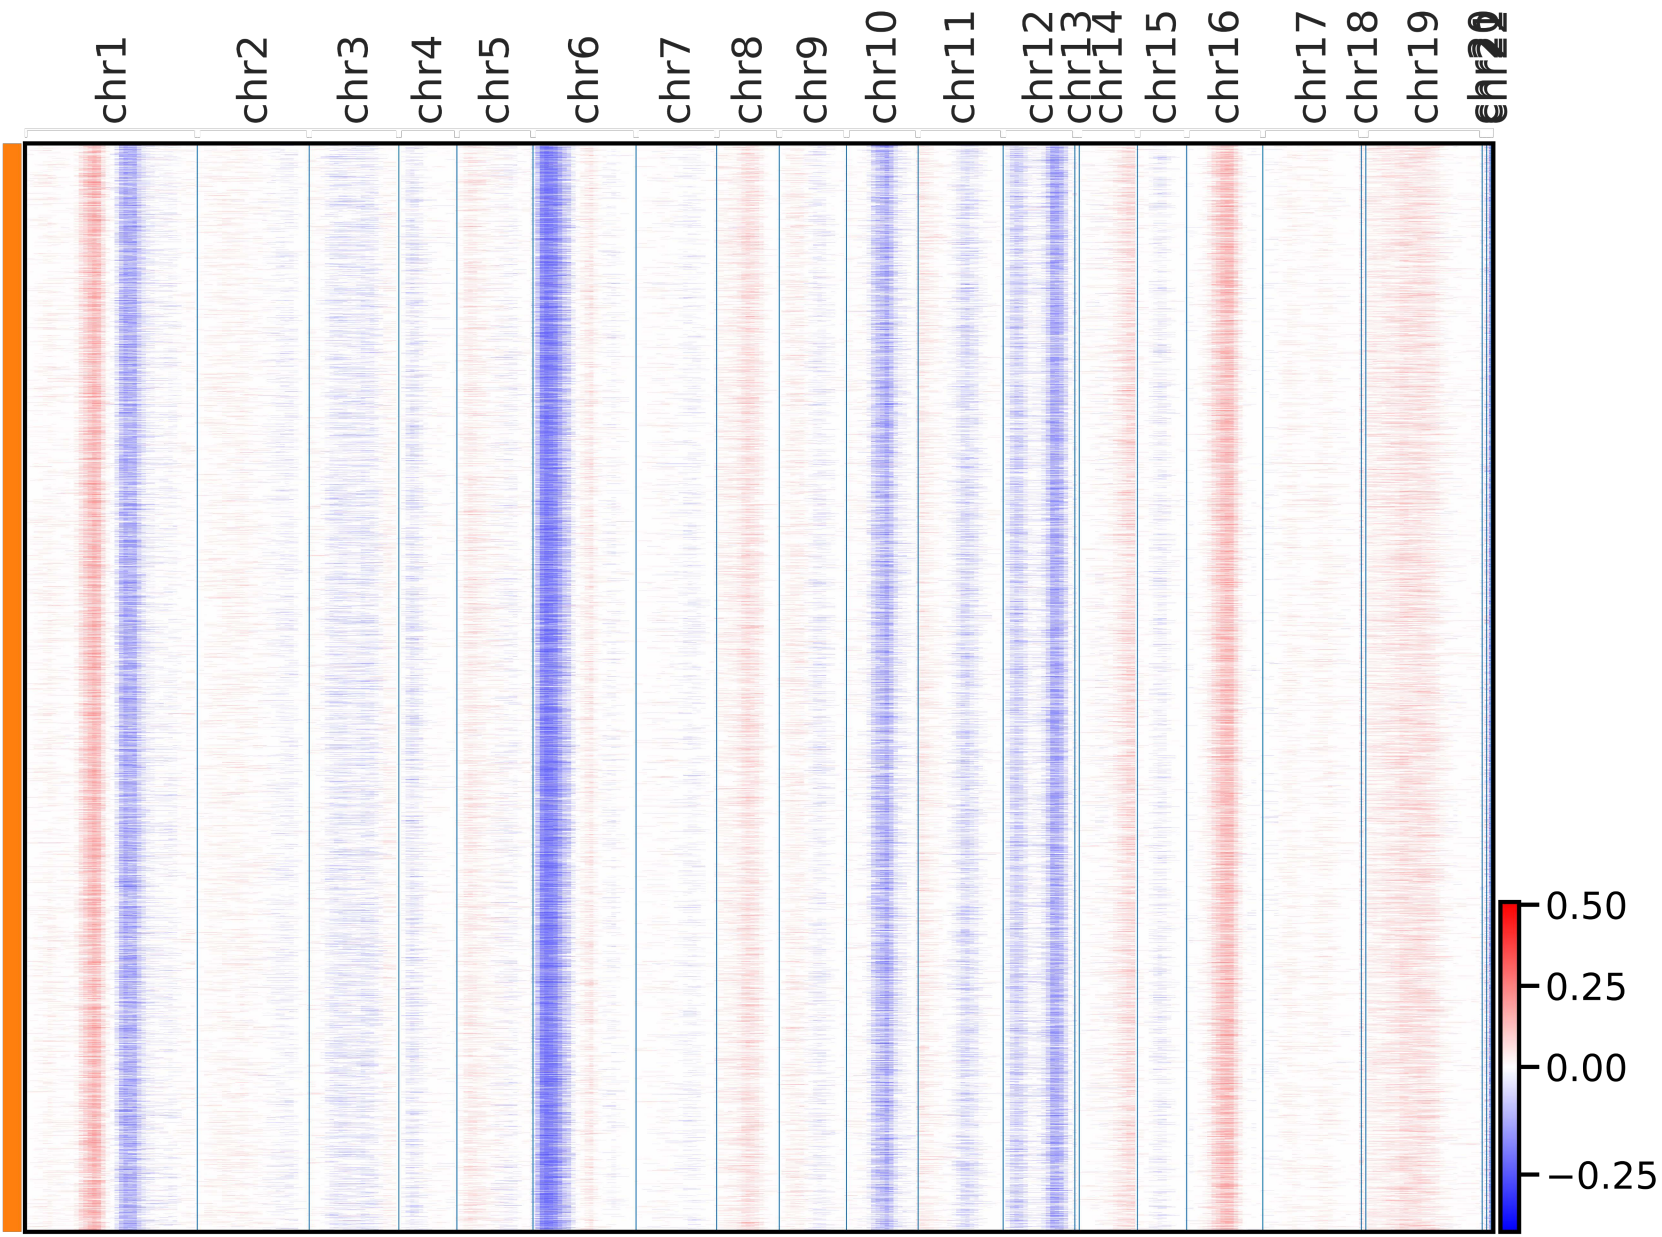



Primary 5

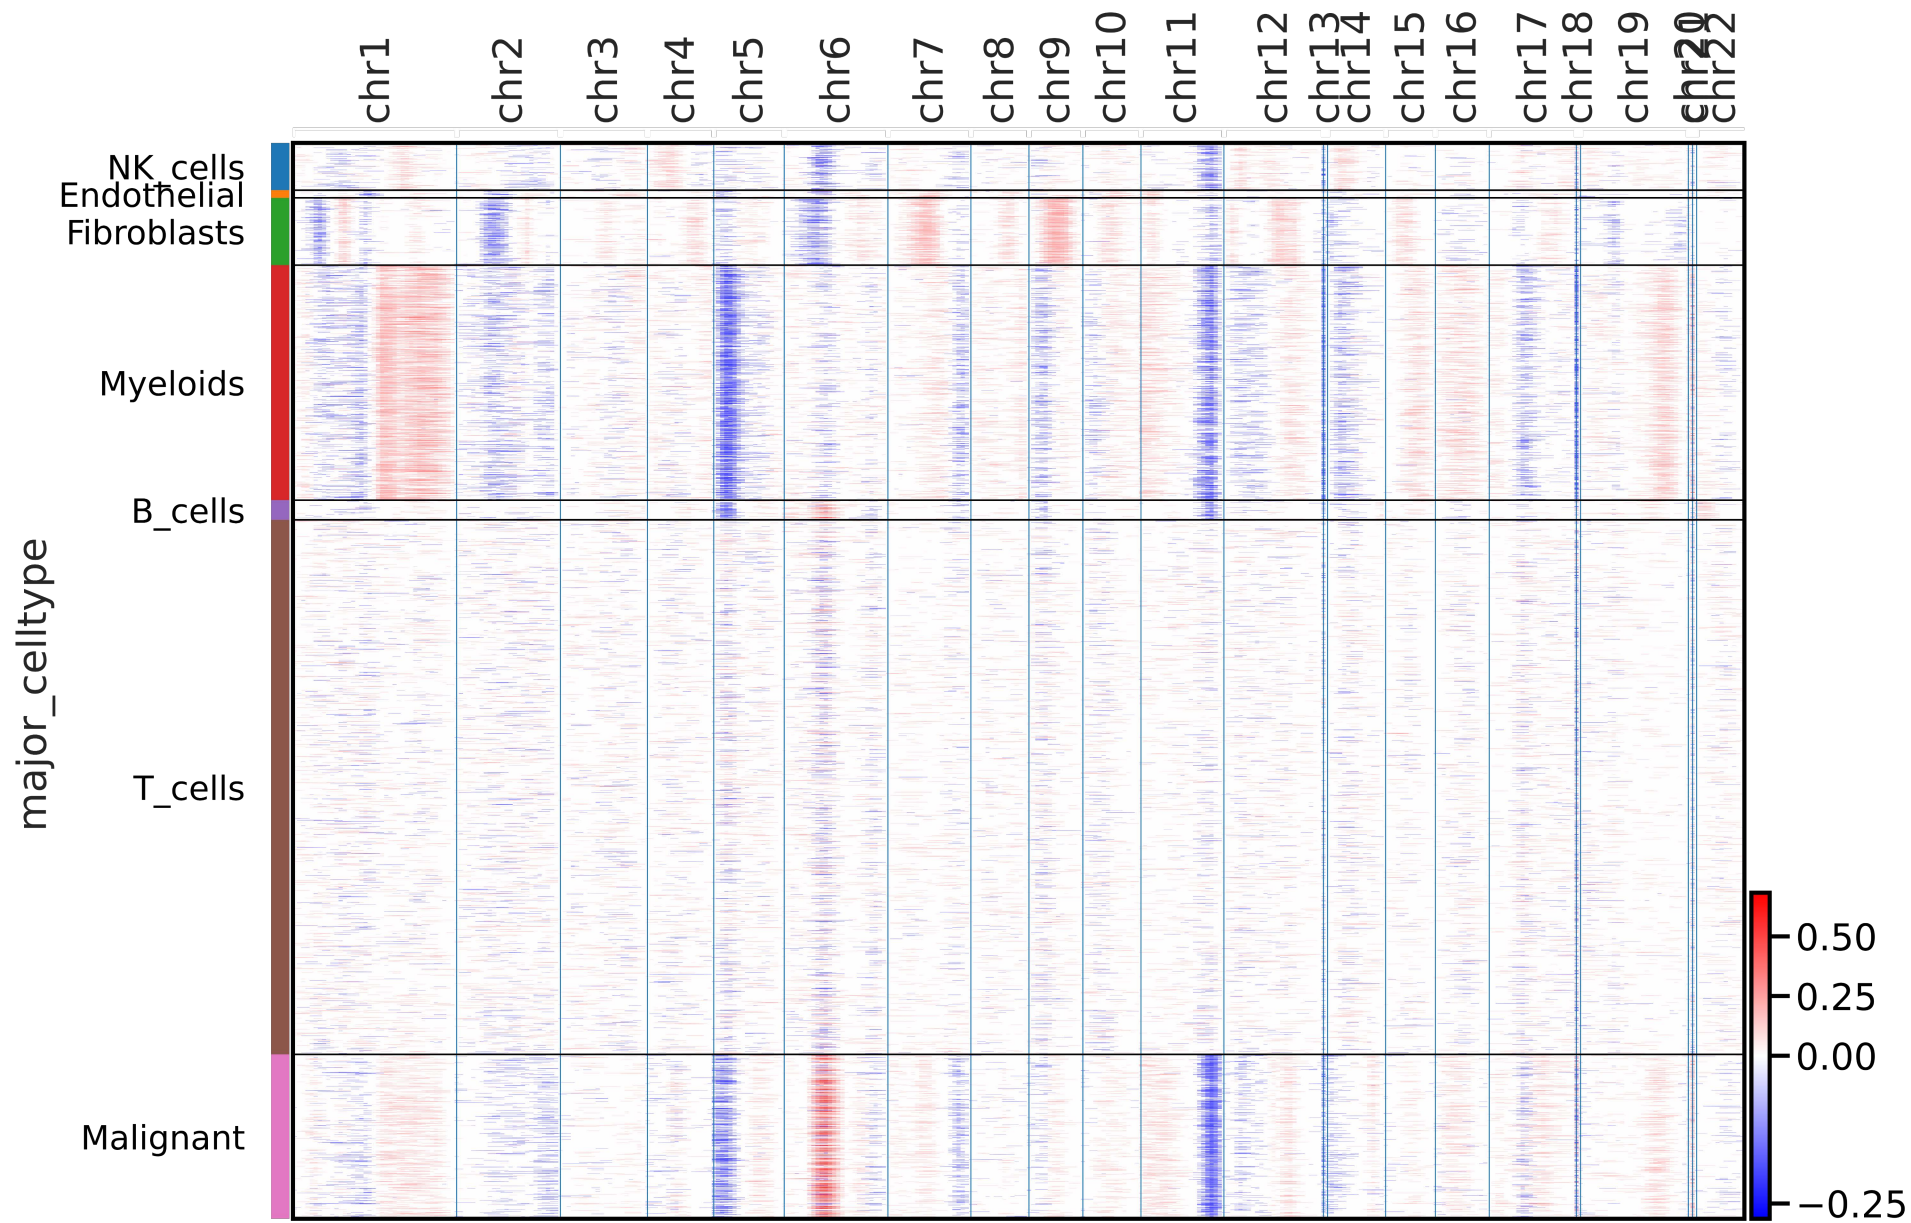

Primary 6

chr1 chr2 chr3 chr4 chr5 chr6 chr7 chr8 chr9 chr10 chr11 chr12 chr13 chr14 chr15 chr16 chr17 chr18 chr19 chr20

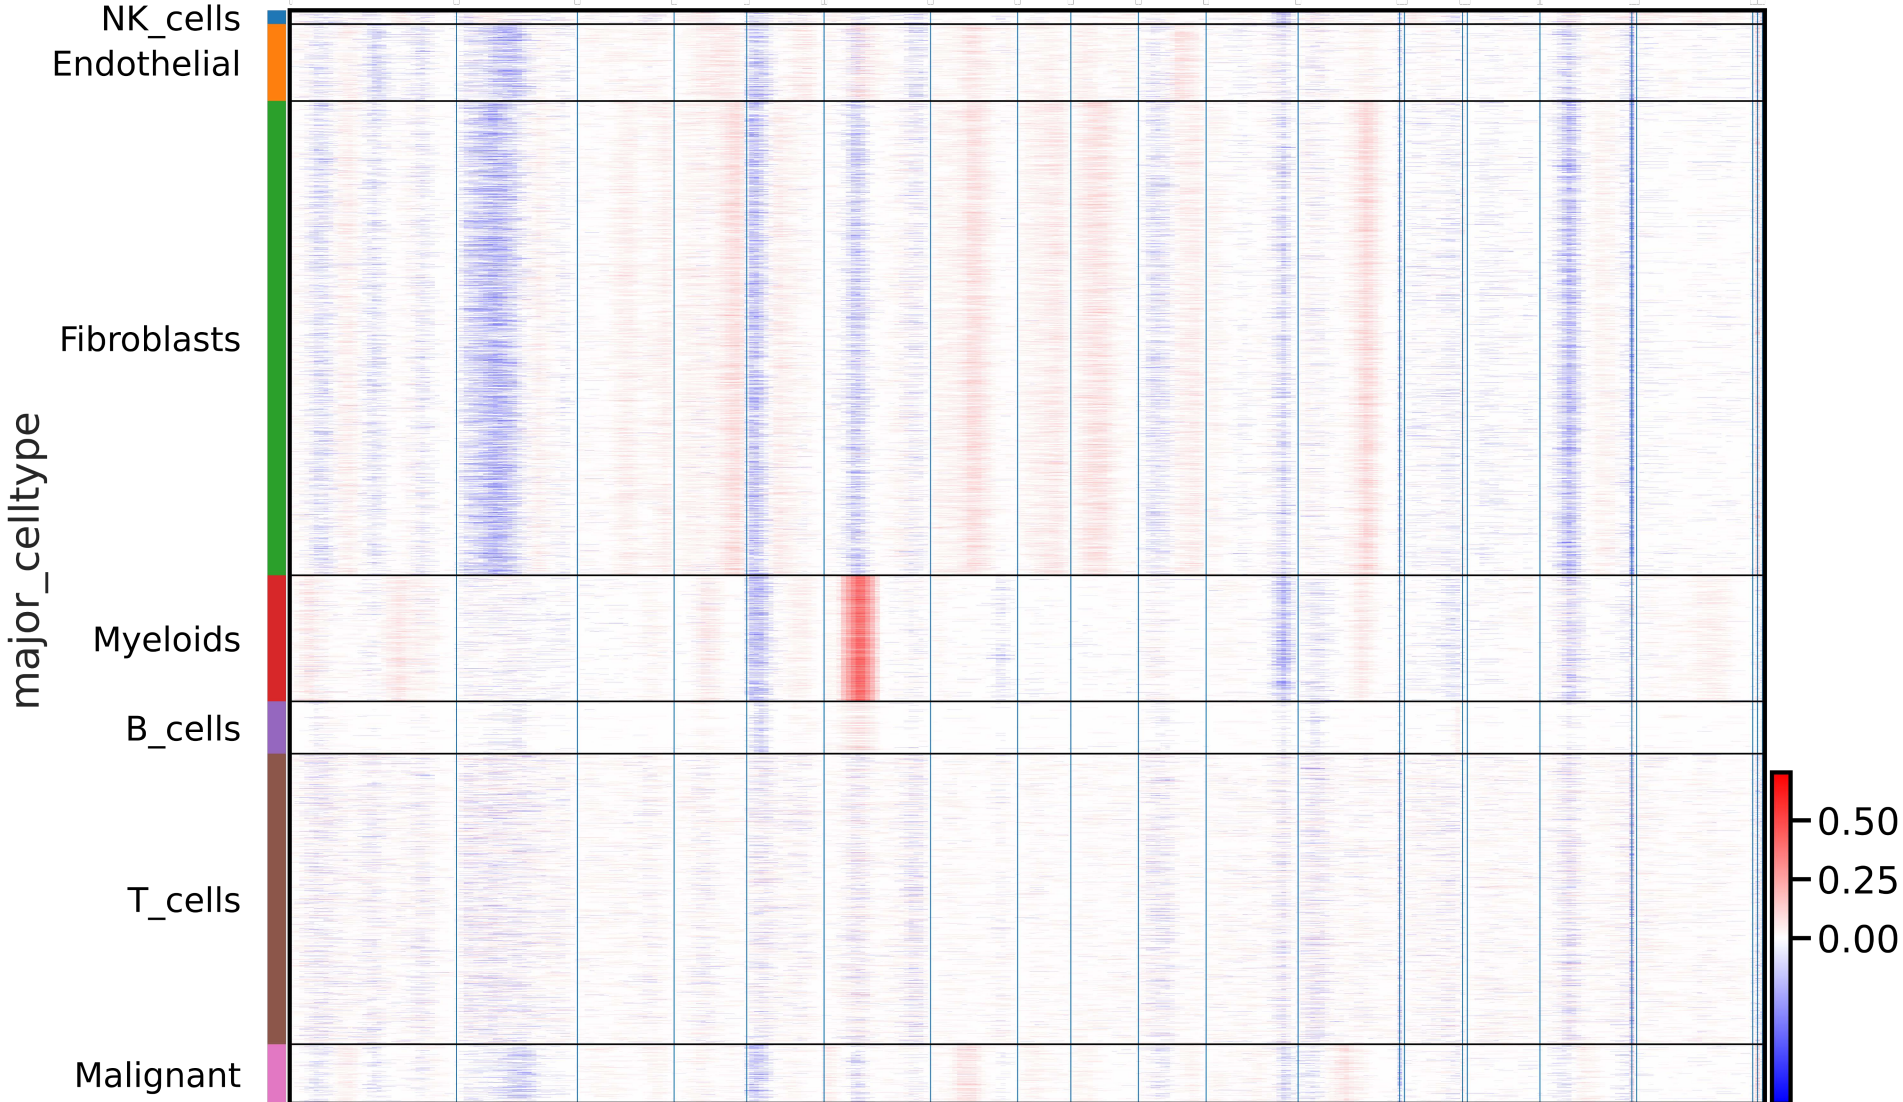



Primary 7

chr1 chr2 chr3 chr4 chr5 chr6 chr7 chr8 chr9 chr10 chr11 chr12 chr13 chr14 chr15 chr16 chr17 chr18 chr19 chr20 chr21 chr22

NK\_cells  
Endothelial  
Fibroblasts  
Myeloids  
B\_cells  
T\_cells  
Malignant

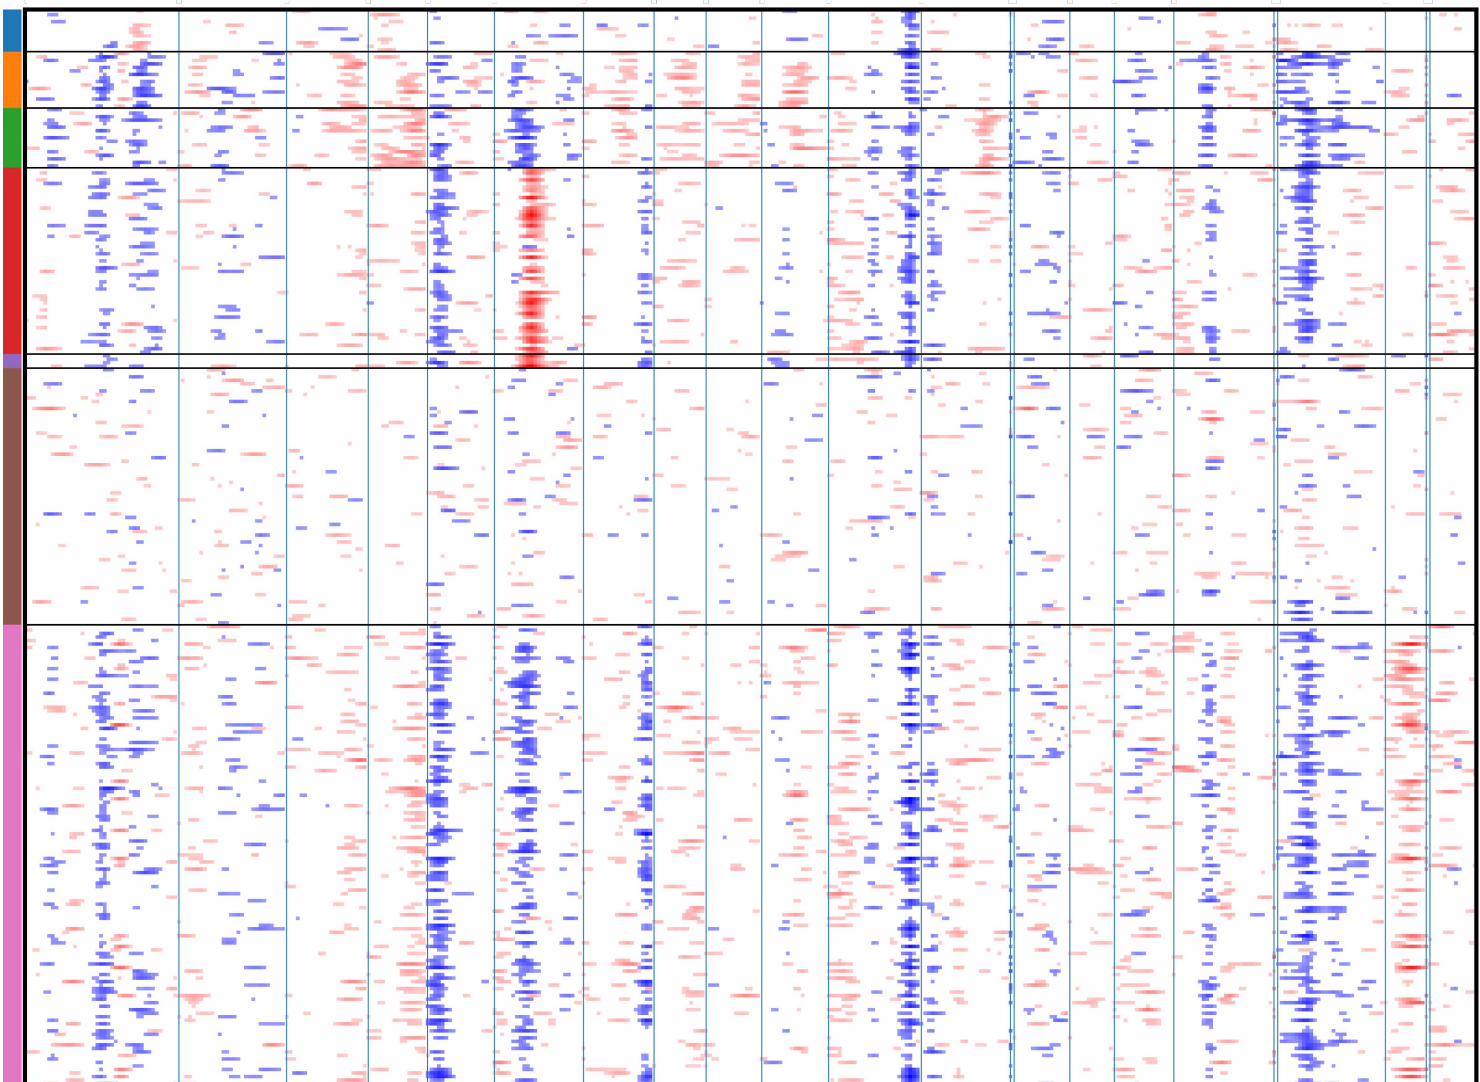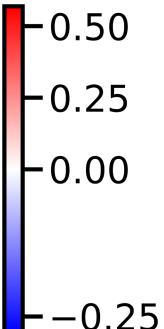





Primary 9

major\_celltype

Endothelial  
Fibroblasts  
T\_cells

Malignant

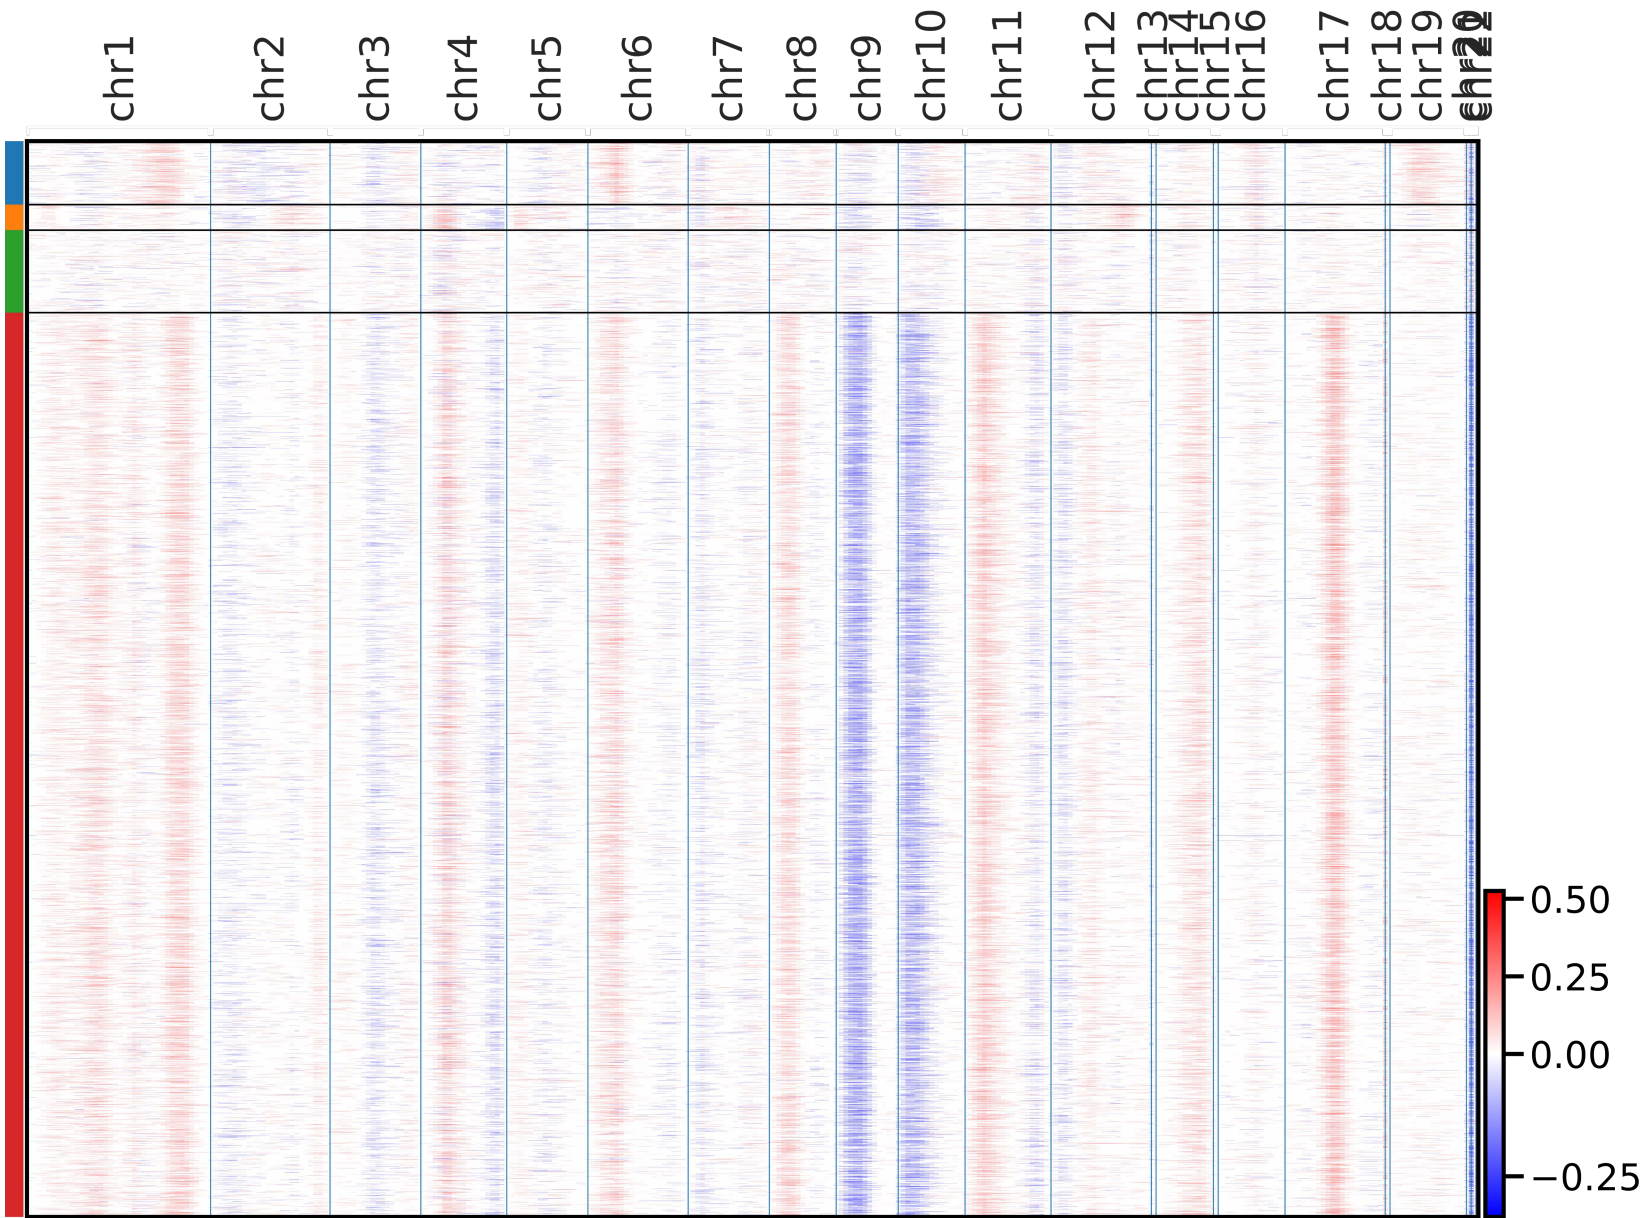

Primary 10

major\_celltype

Endothelial  
Fibroblasts

T\_cells

Malignant

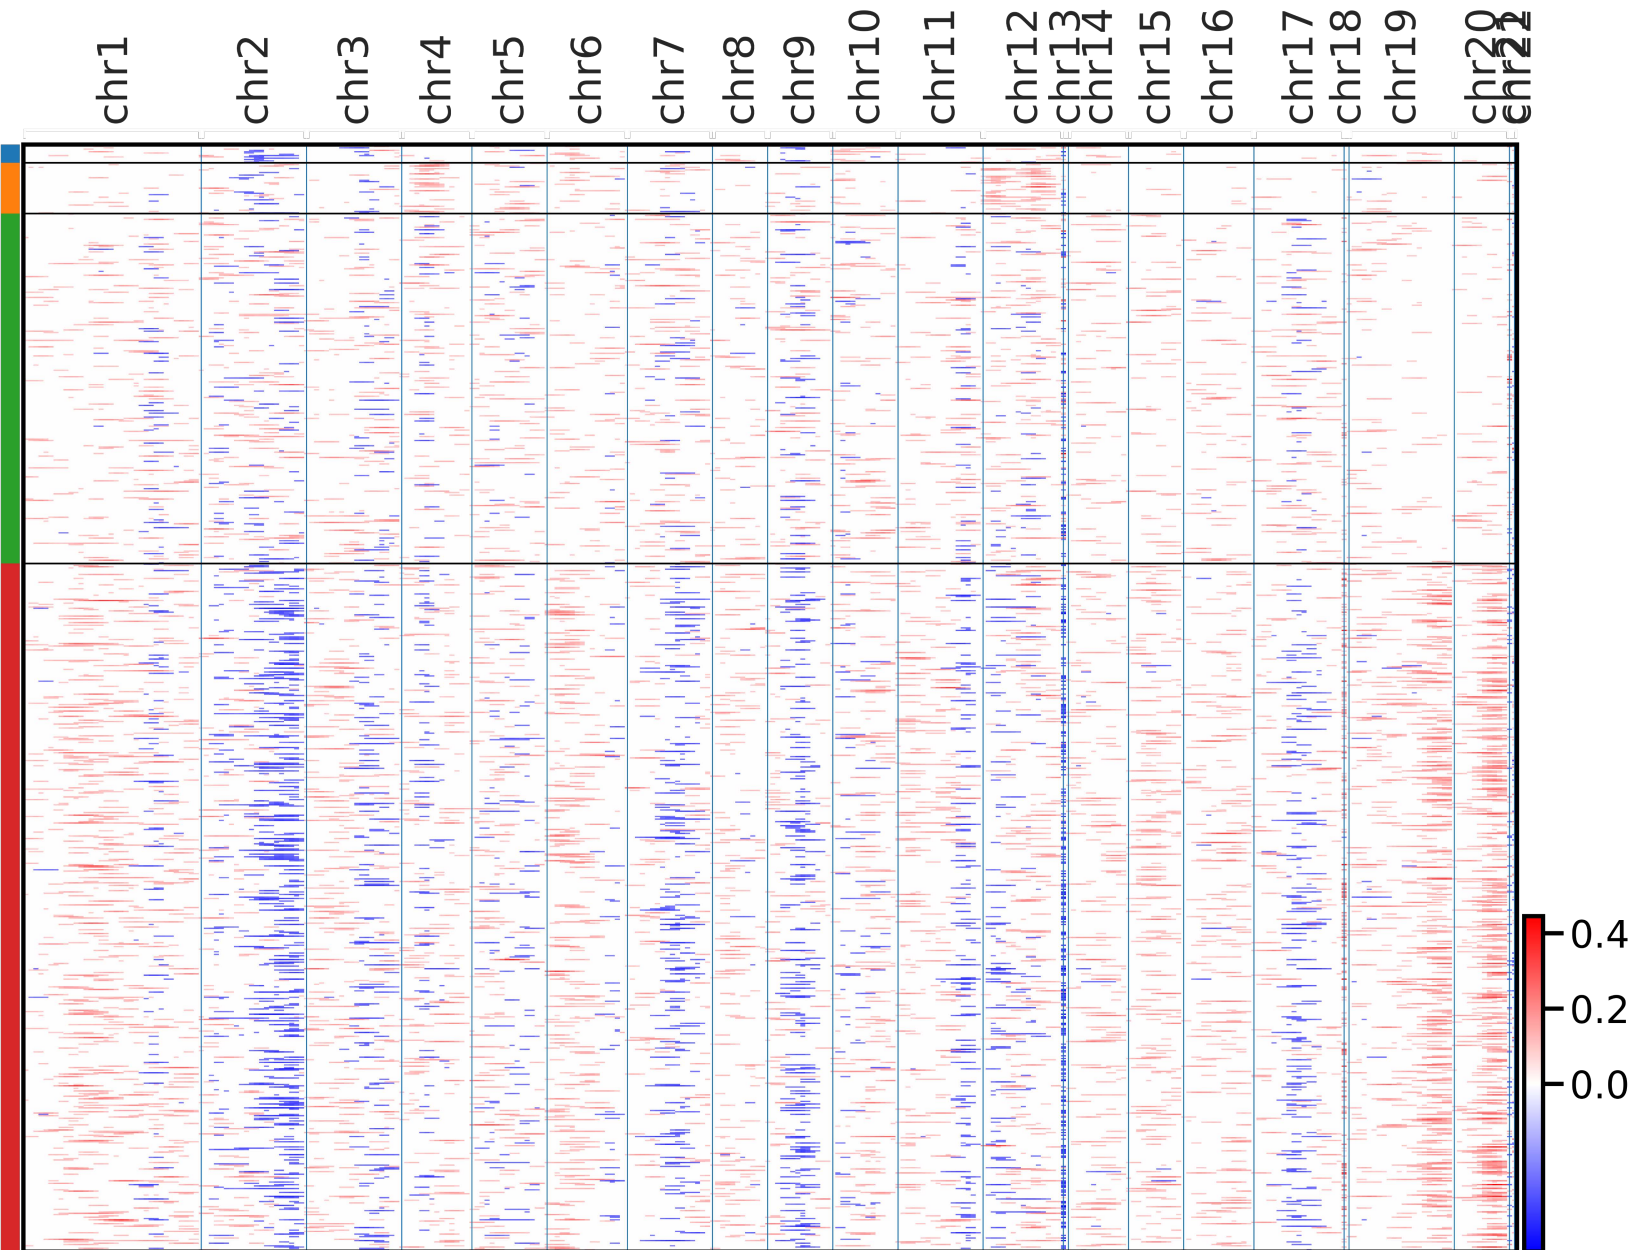

chr1

chr2

chr3

chr4

chr5

chr6

chr7

chr8

chr9

chr10

chr11

chr12

chr13

chr14

chr15

chr16

chr17

chr18

chr19

chr20

chr21

chr22

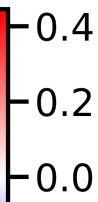



Primary 11

major\_celltype

Endothelial  
T\_cells

Malignant

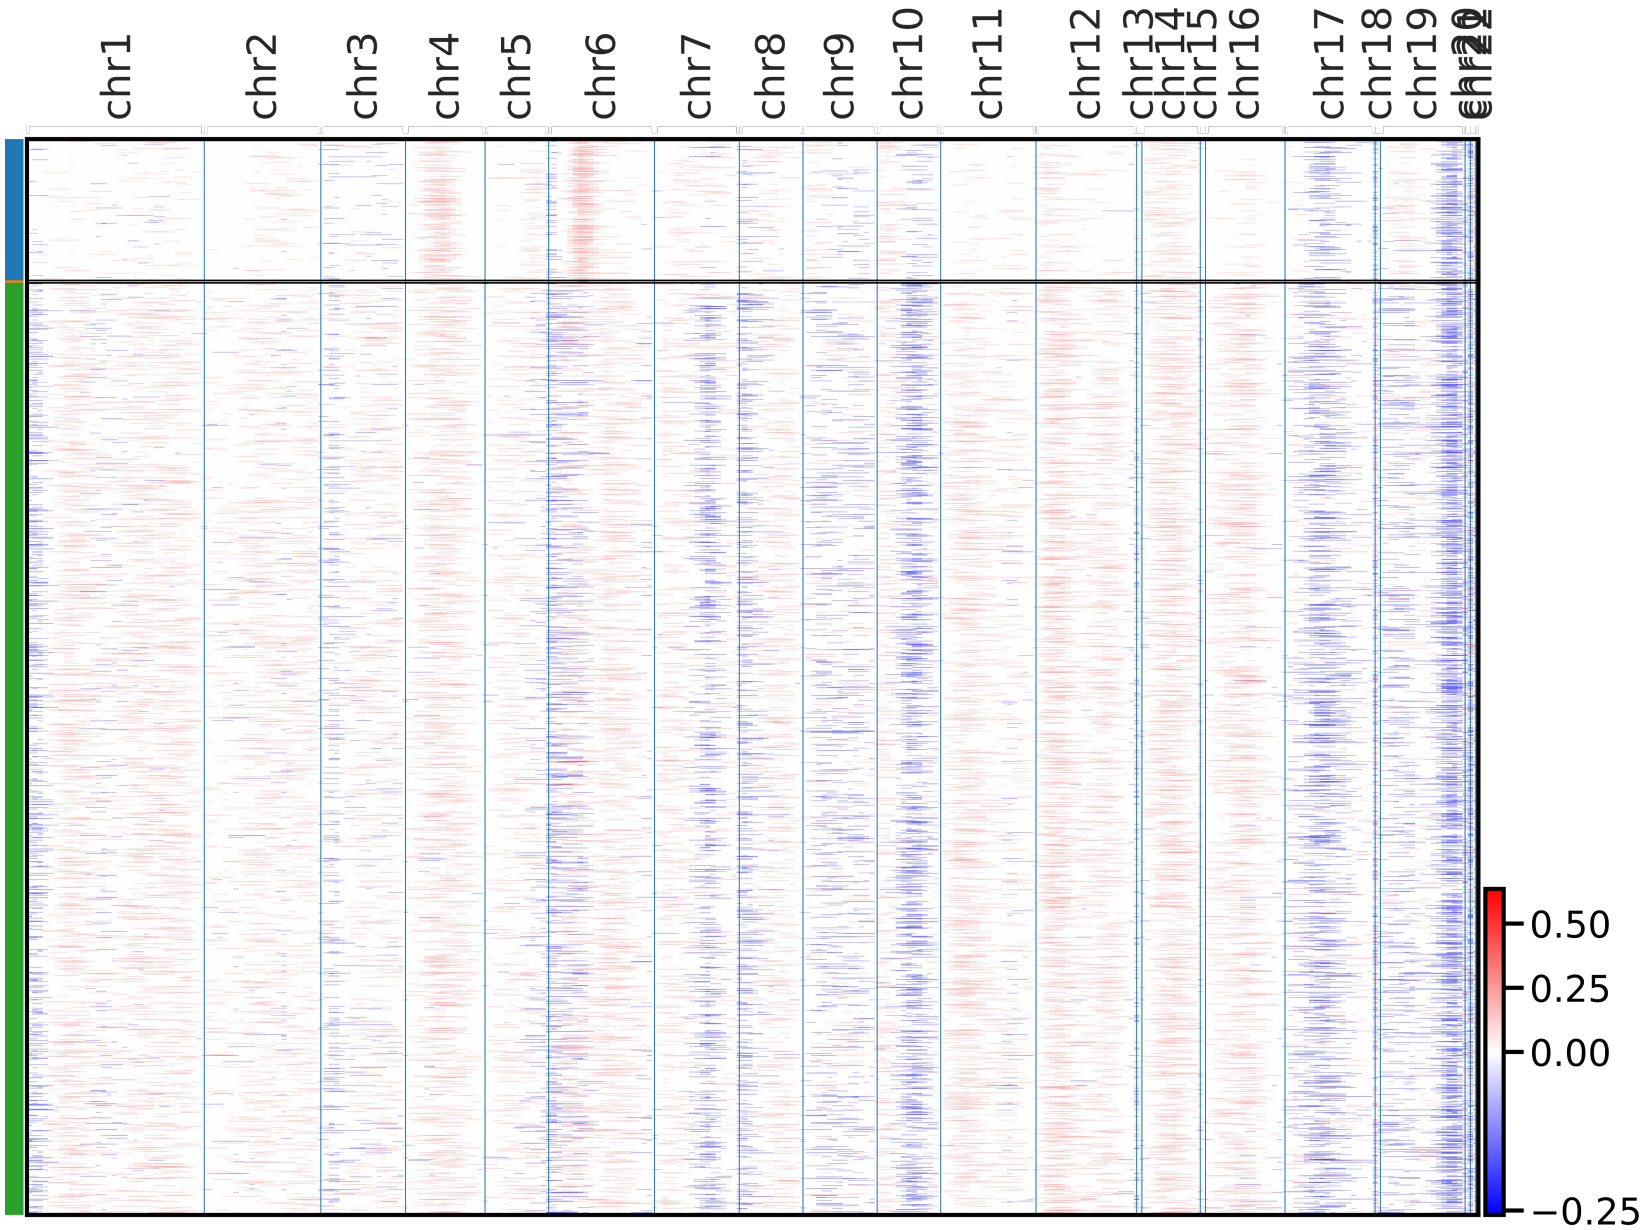

Primary 12

major\_celltype

Fibroblasts

T\_cells

Malignant

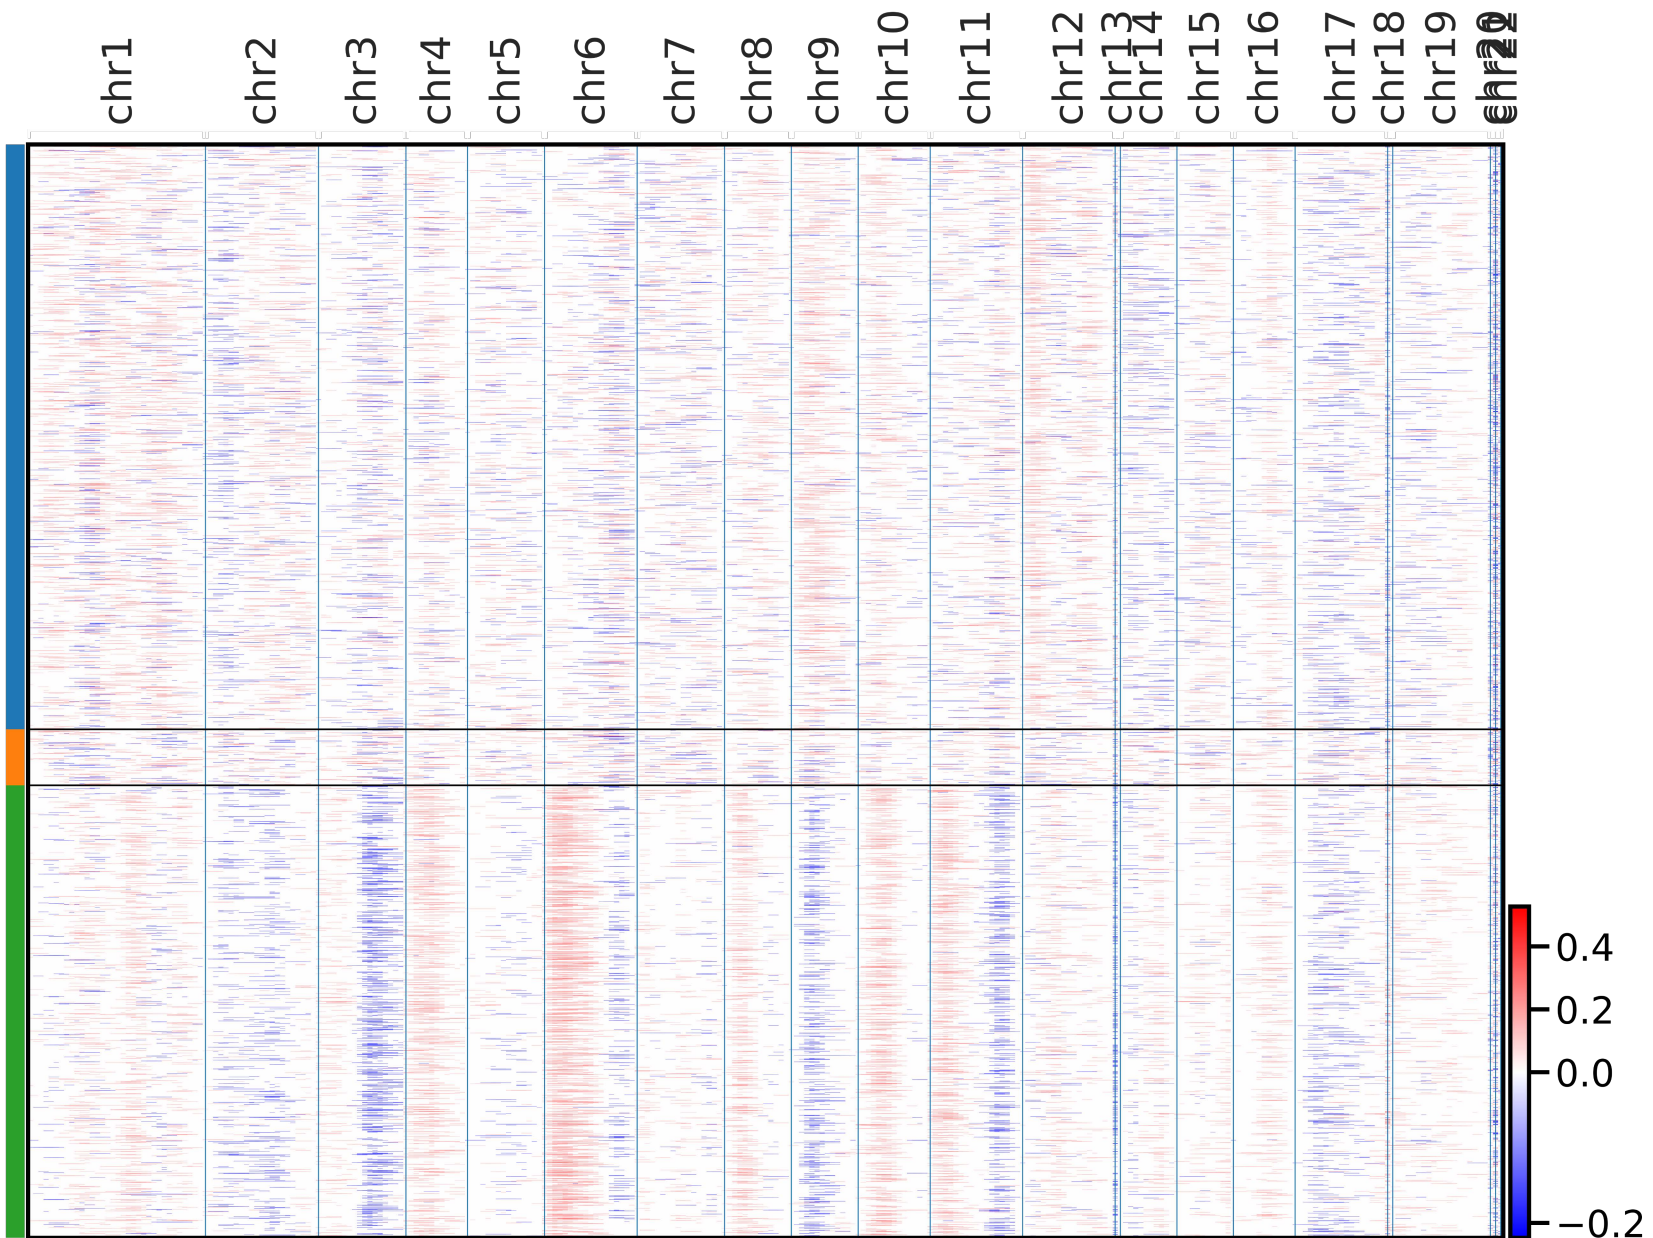



Metastasis 1

chr1 chr2 chr3 chr4 chr5 chr6 chr7 chr8 chr9 chr10 chr11 chr12 chr13 chr14 chr15 chr16 chr17 chr18 chr19 chr20 chr21 chr22

NK cells  
Fibroblasts  
Myeloids

B\_cells

T\_cells

Malignant

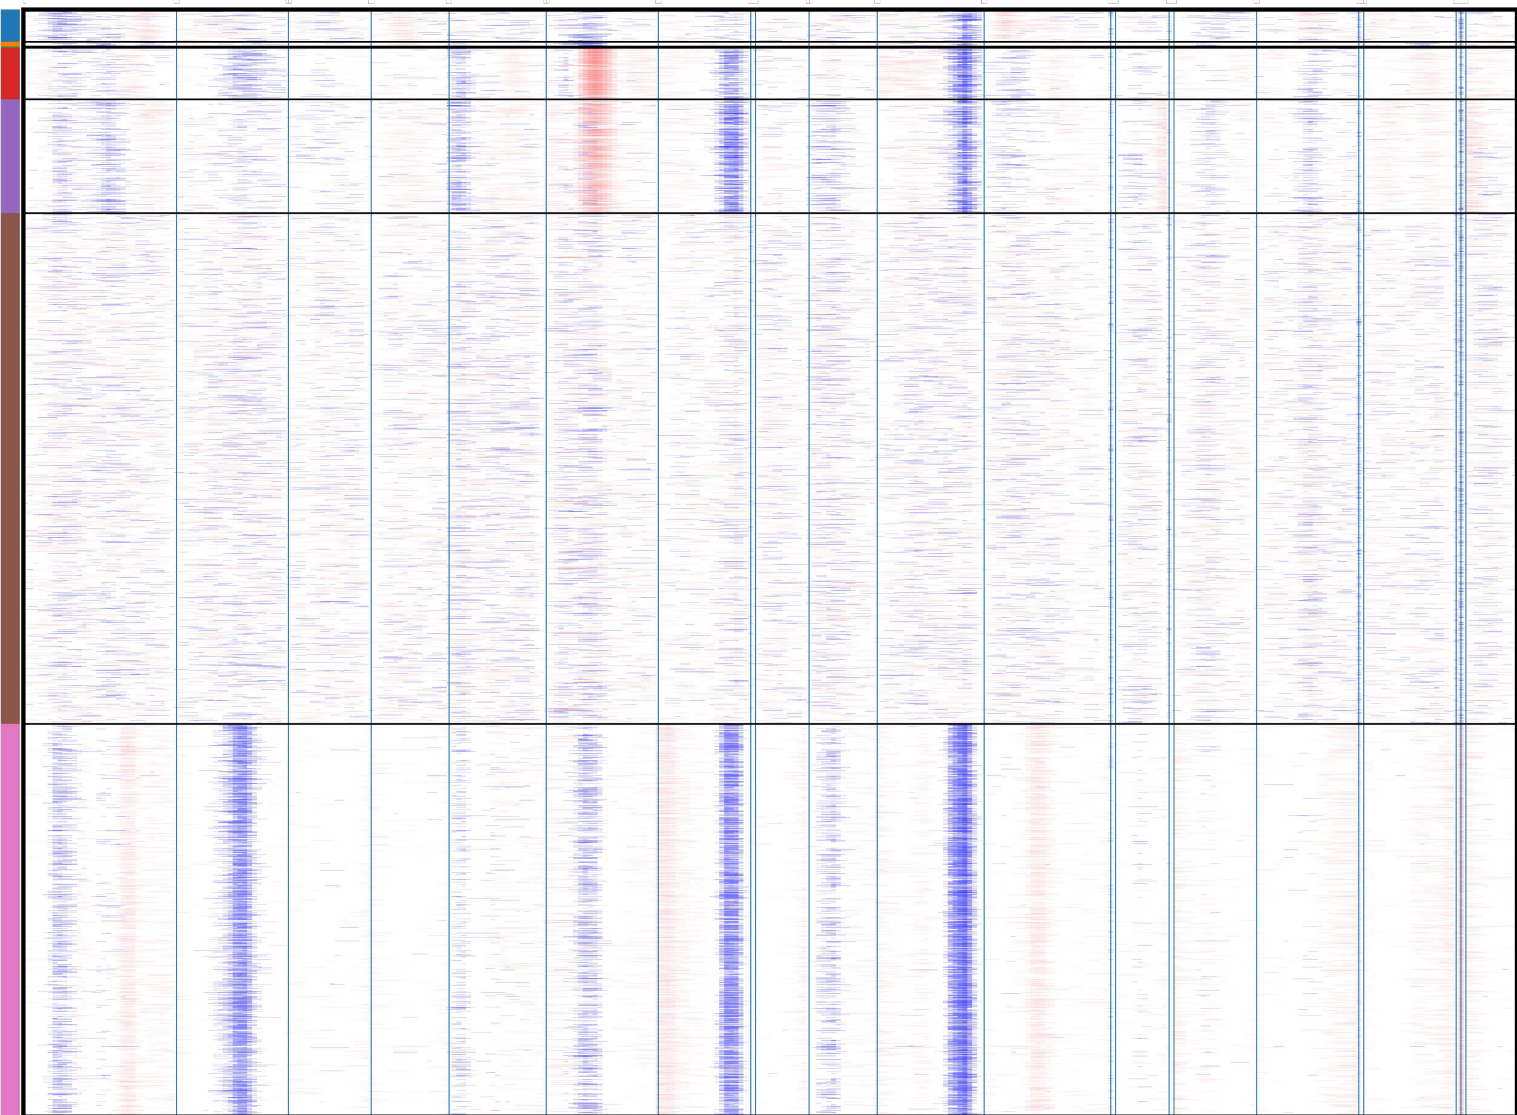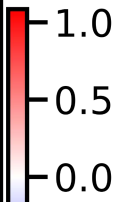

Metastasis 2

major\_celltype

Myeloid cells  
T cells

Malignant

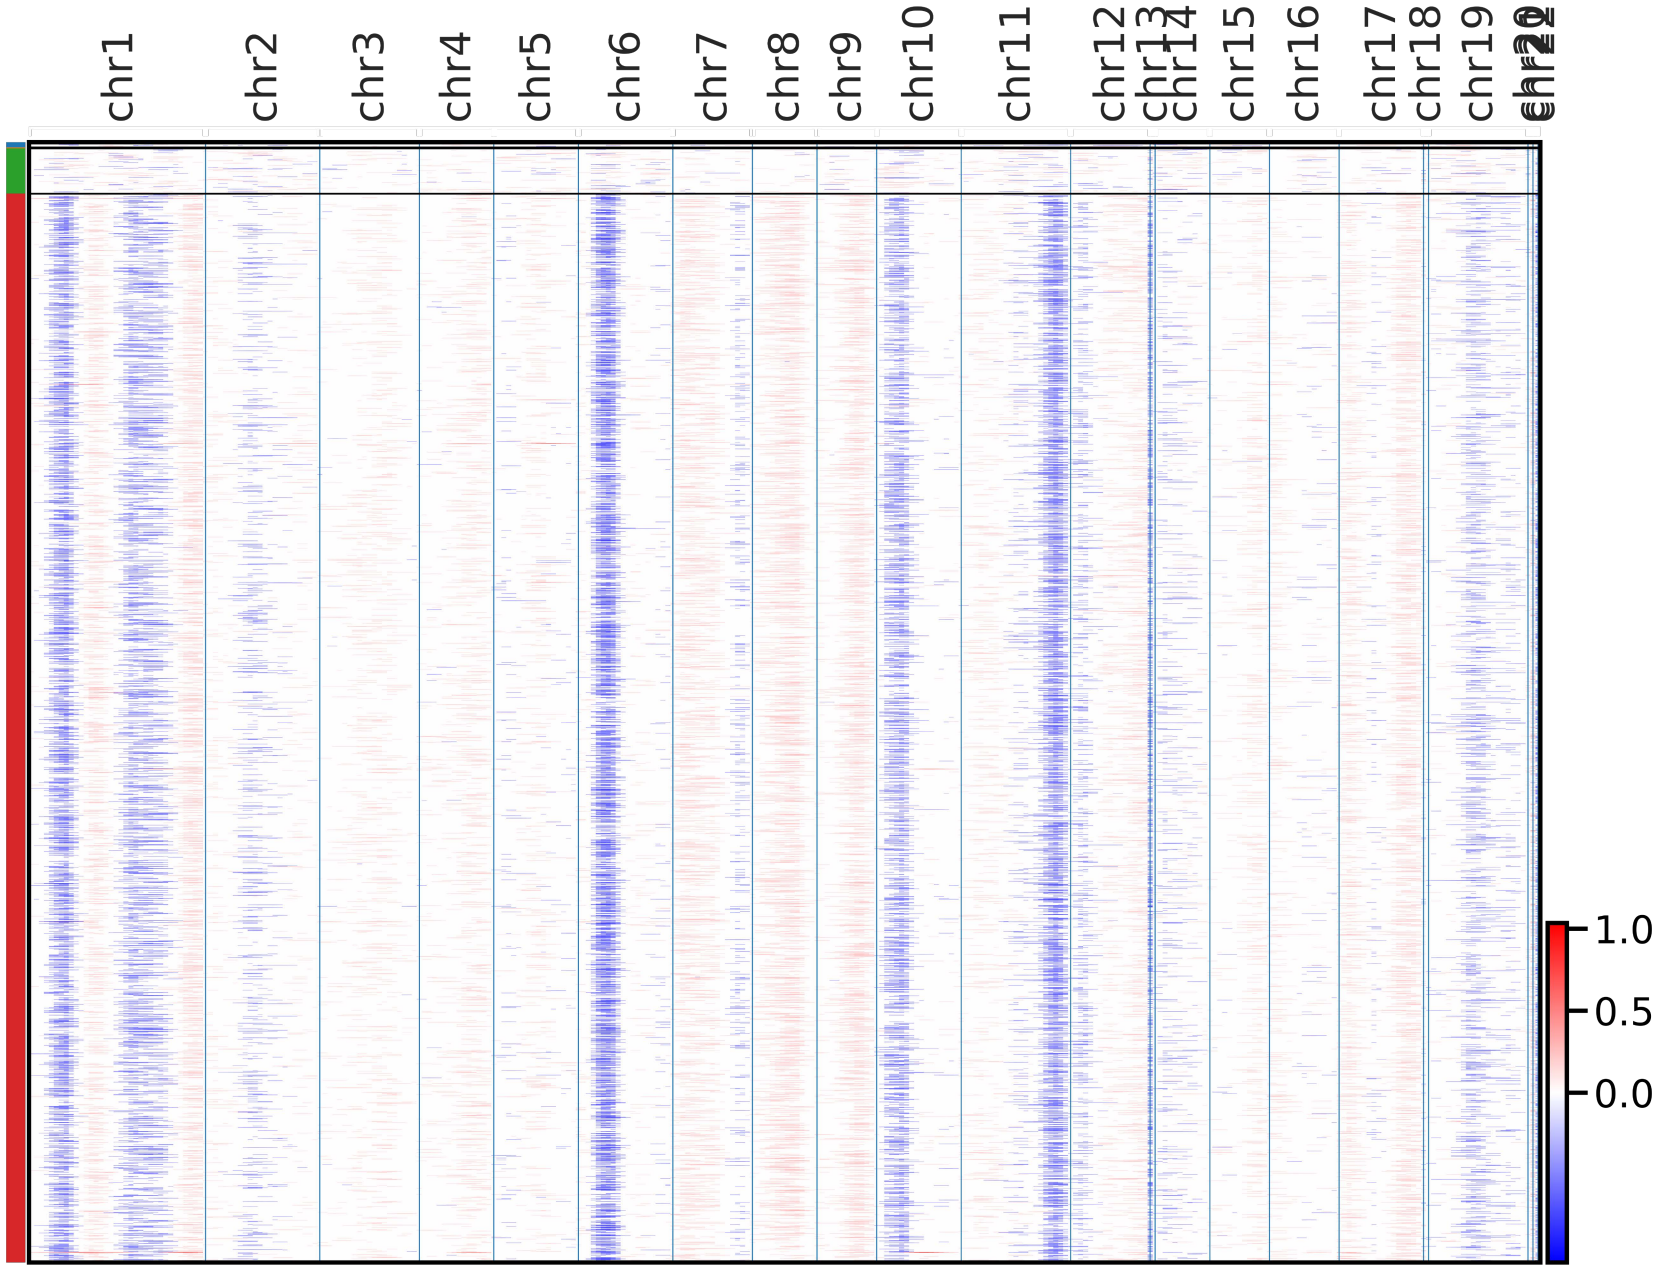



Metastasis 3

major\_celltype

Endothelial  
Myeloids  
T\_cells

Malignant

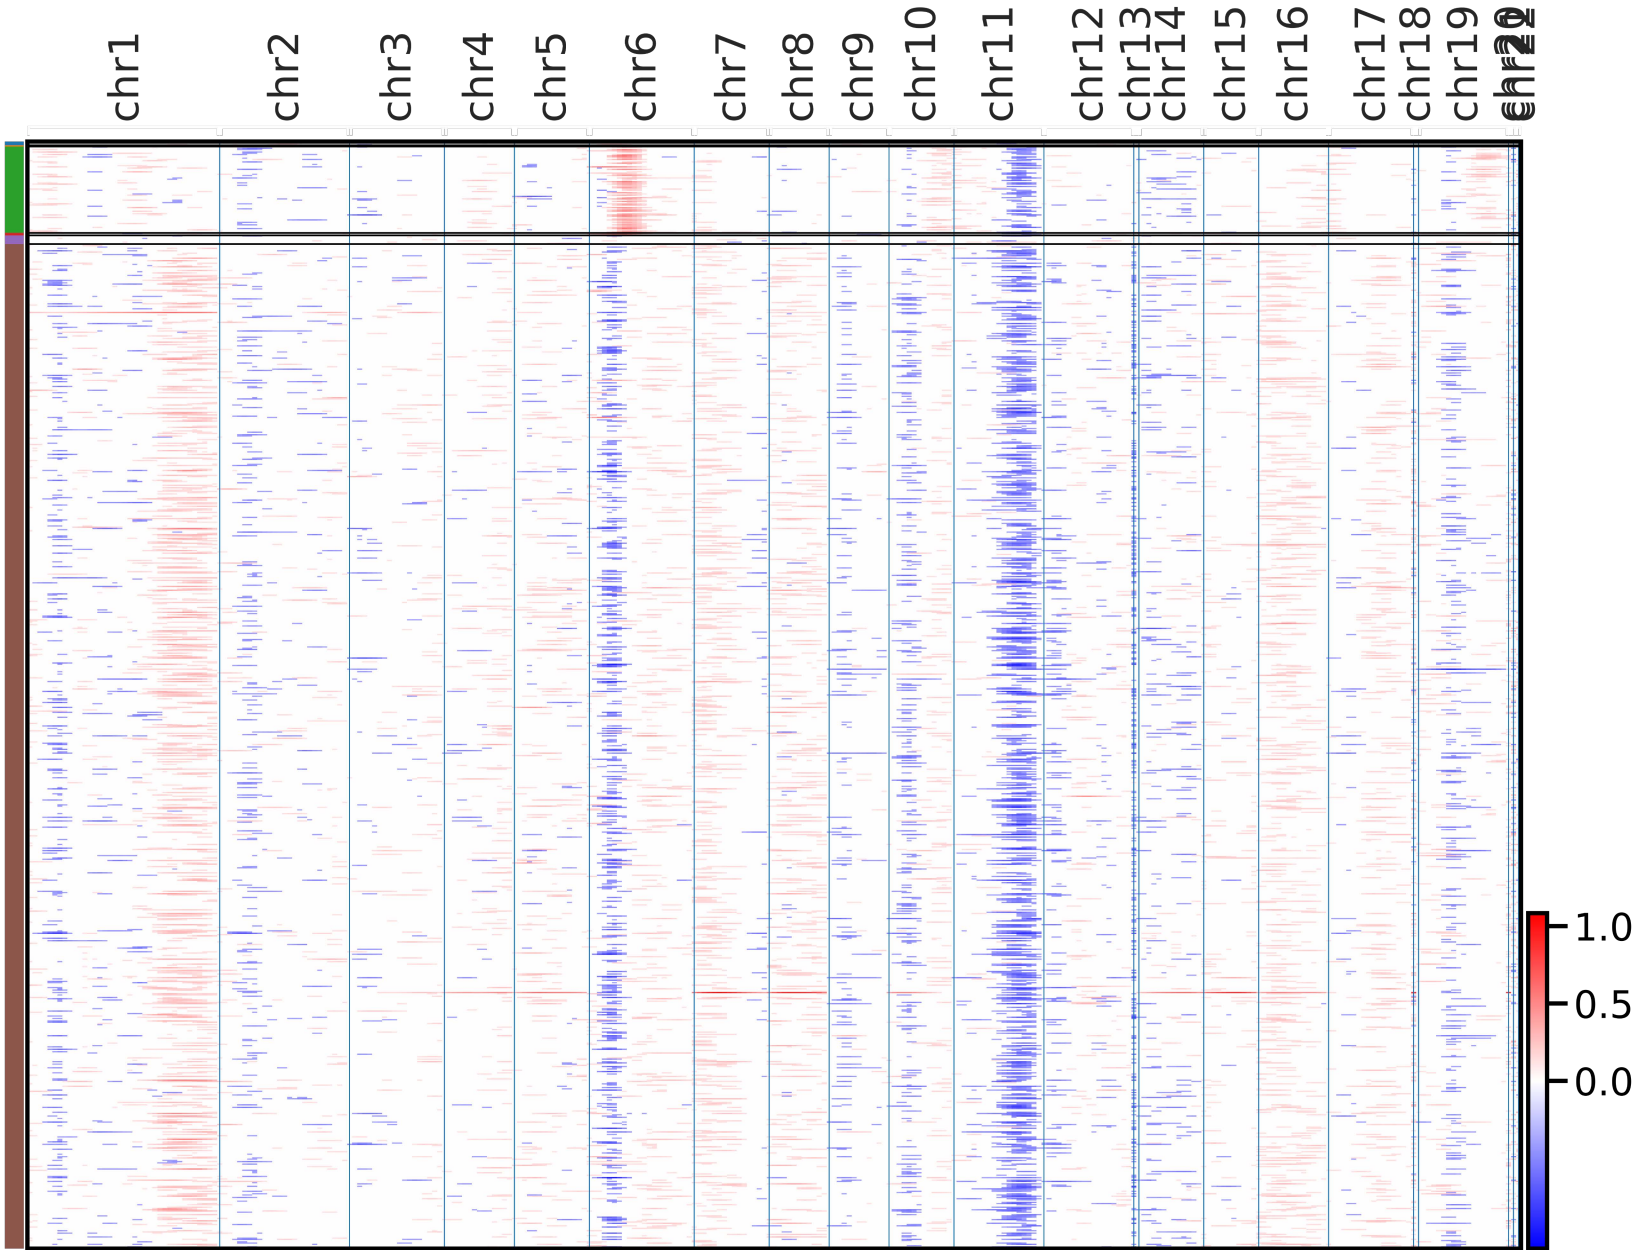

Metastasis 4

major\_celltype

Endothelial  
Fibroblasts  
T\_cells

Malignant

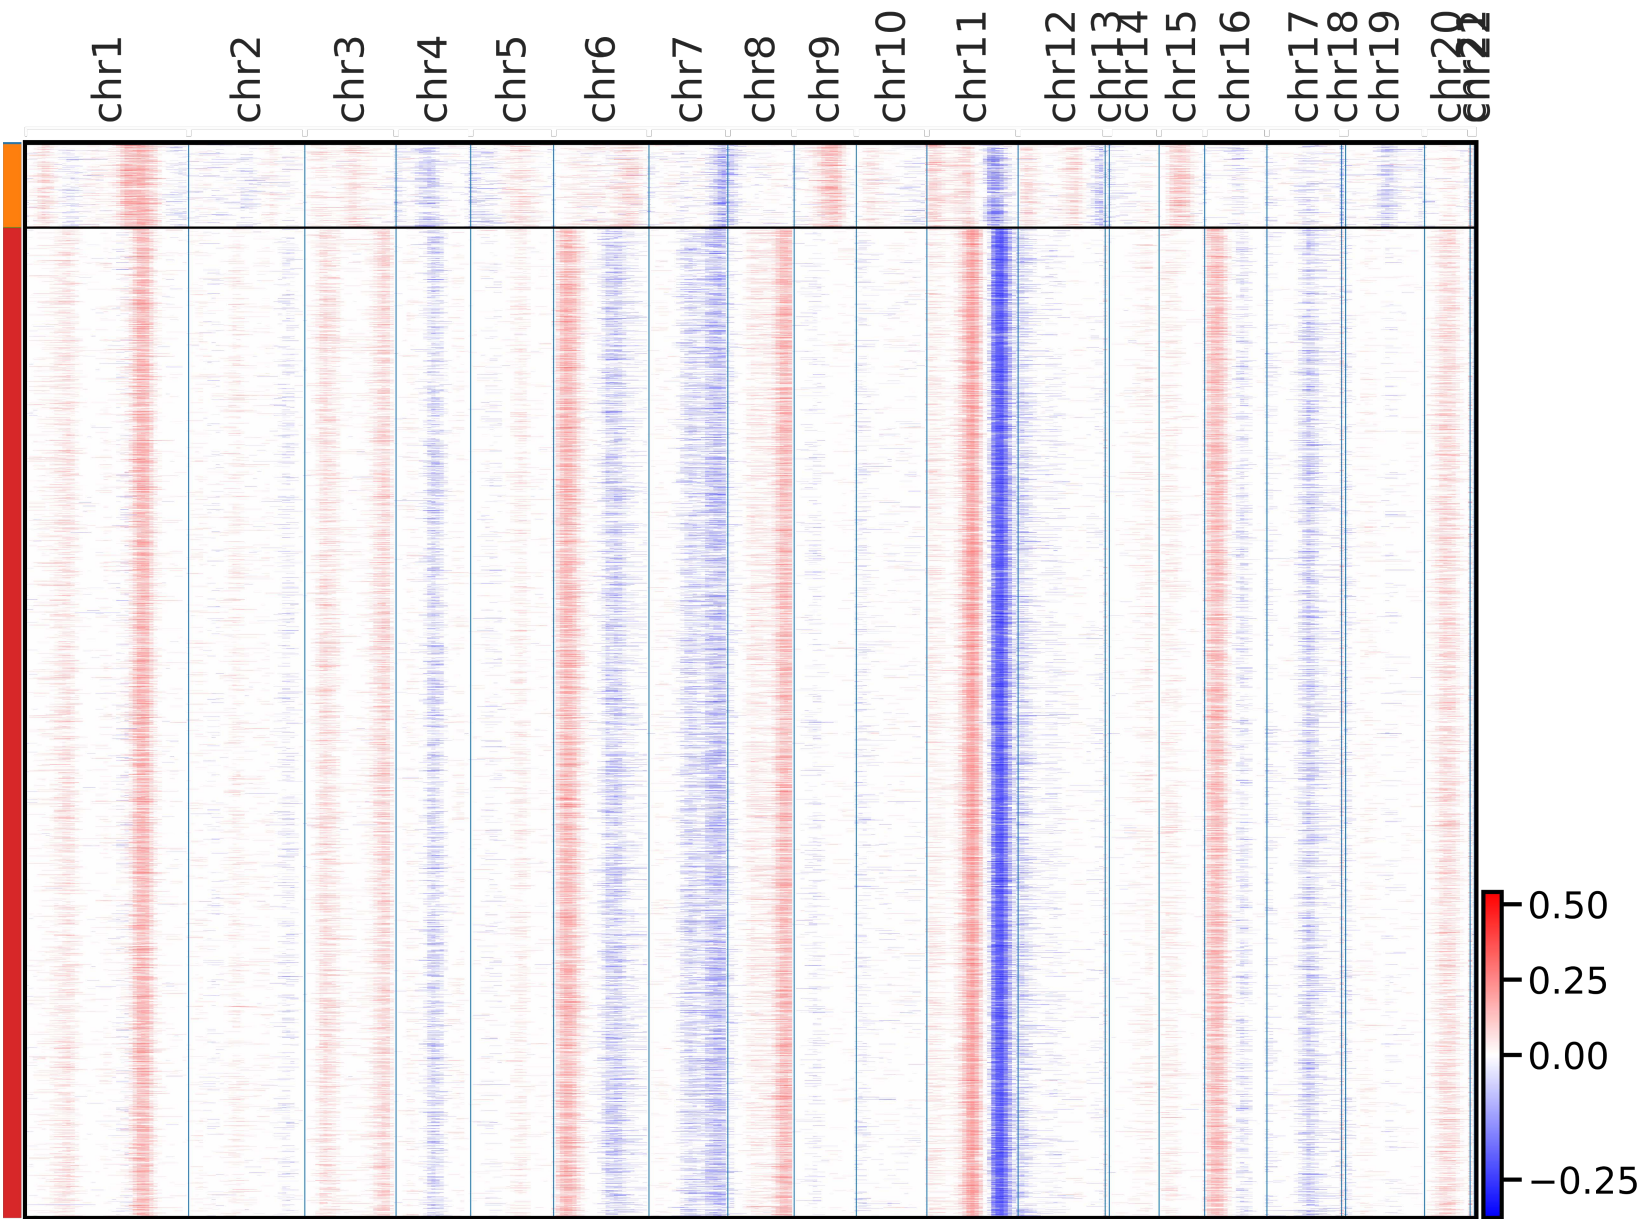



Metastasis 5

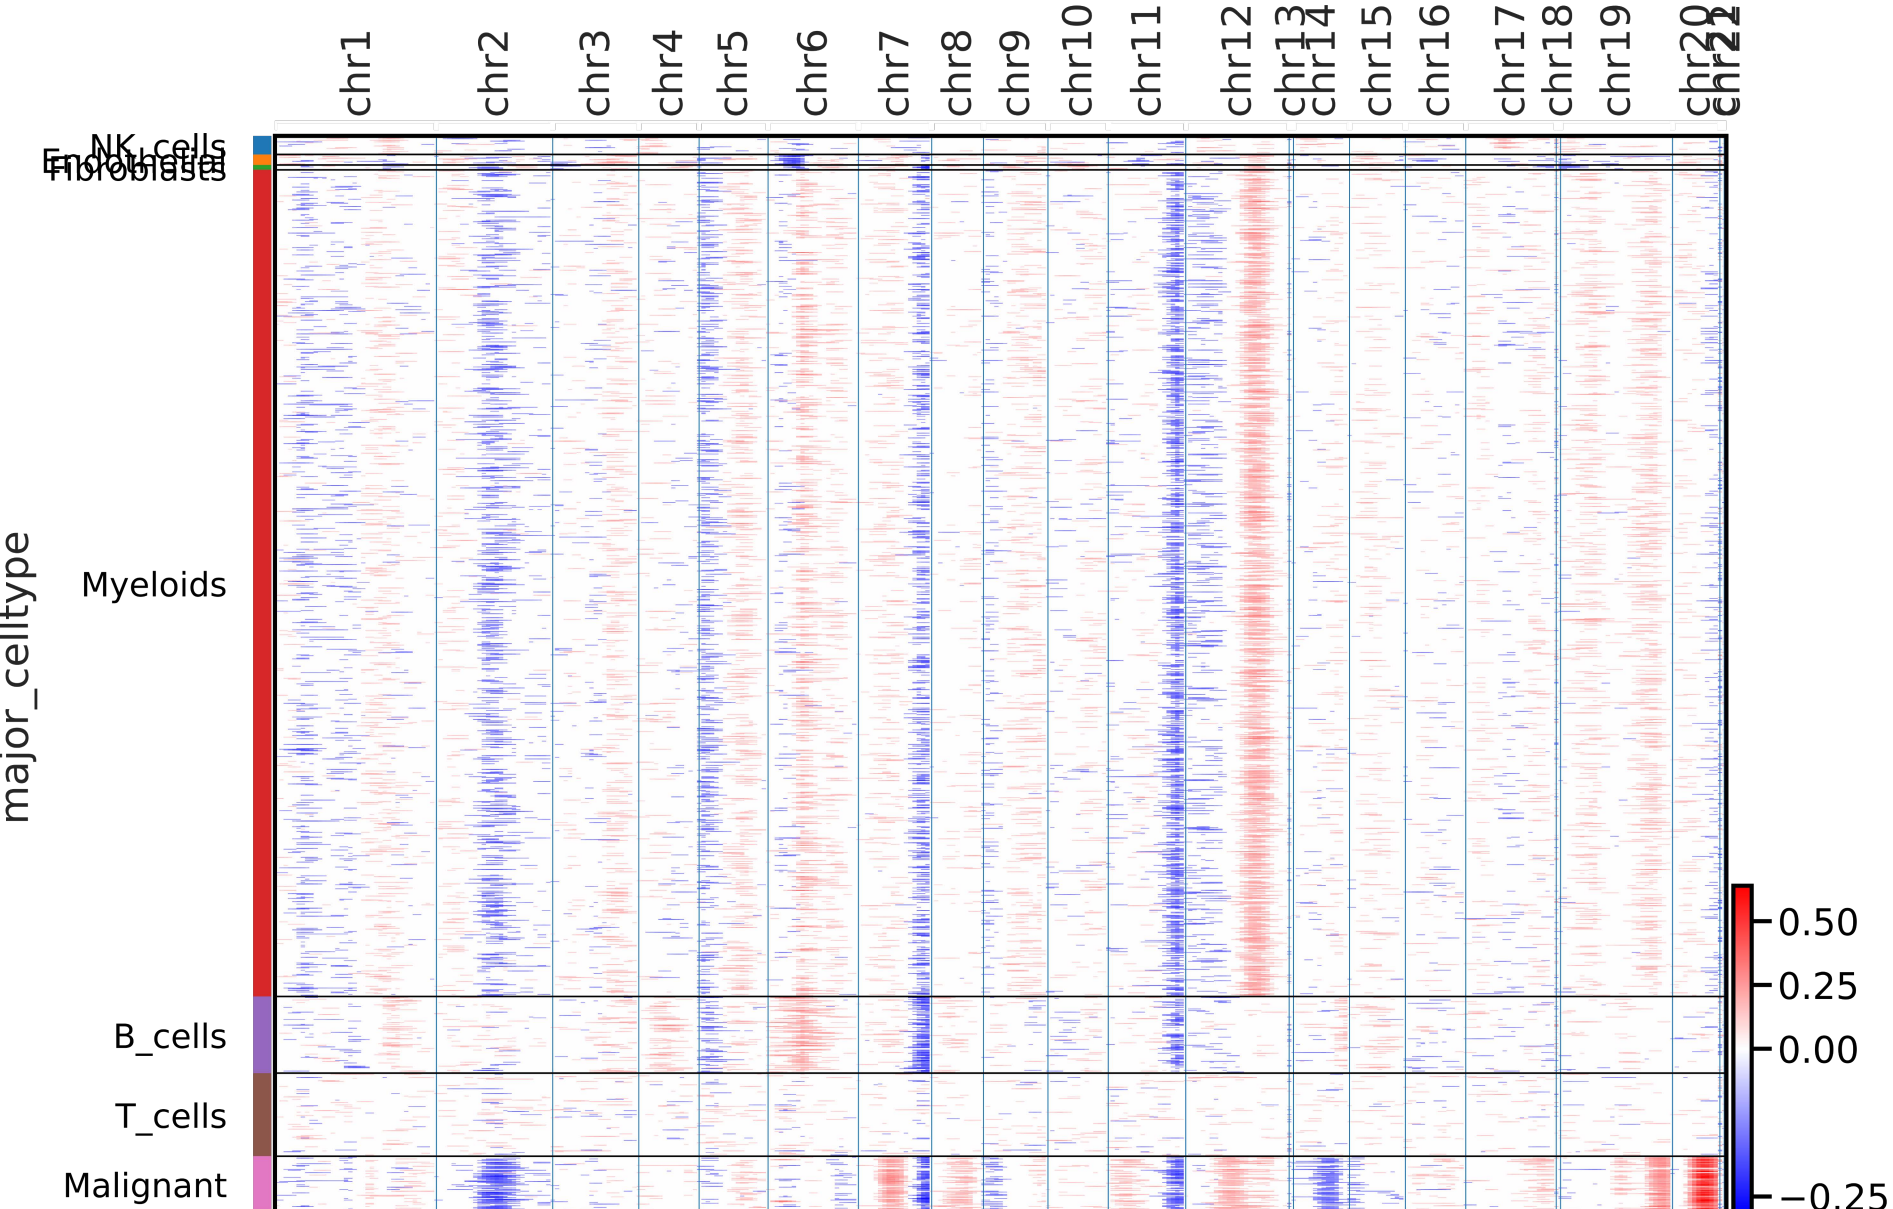

Metastasis 6

chr1 chr2 chr3 chr4 chr5 chr6 chr7 chr8 chr9 chr10 chr11 chr12 chr13 chr14 chr15 chr16 chr17 chr18 chr19 chr20 chr21 chr22

NK\_cells  
Endothelial

Fibroblasts

Myeloids

B\_cells

T\_cells

major\_celltype

Malignant

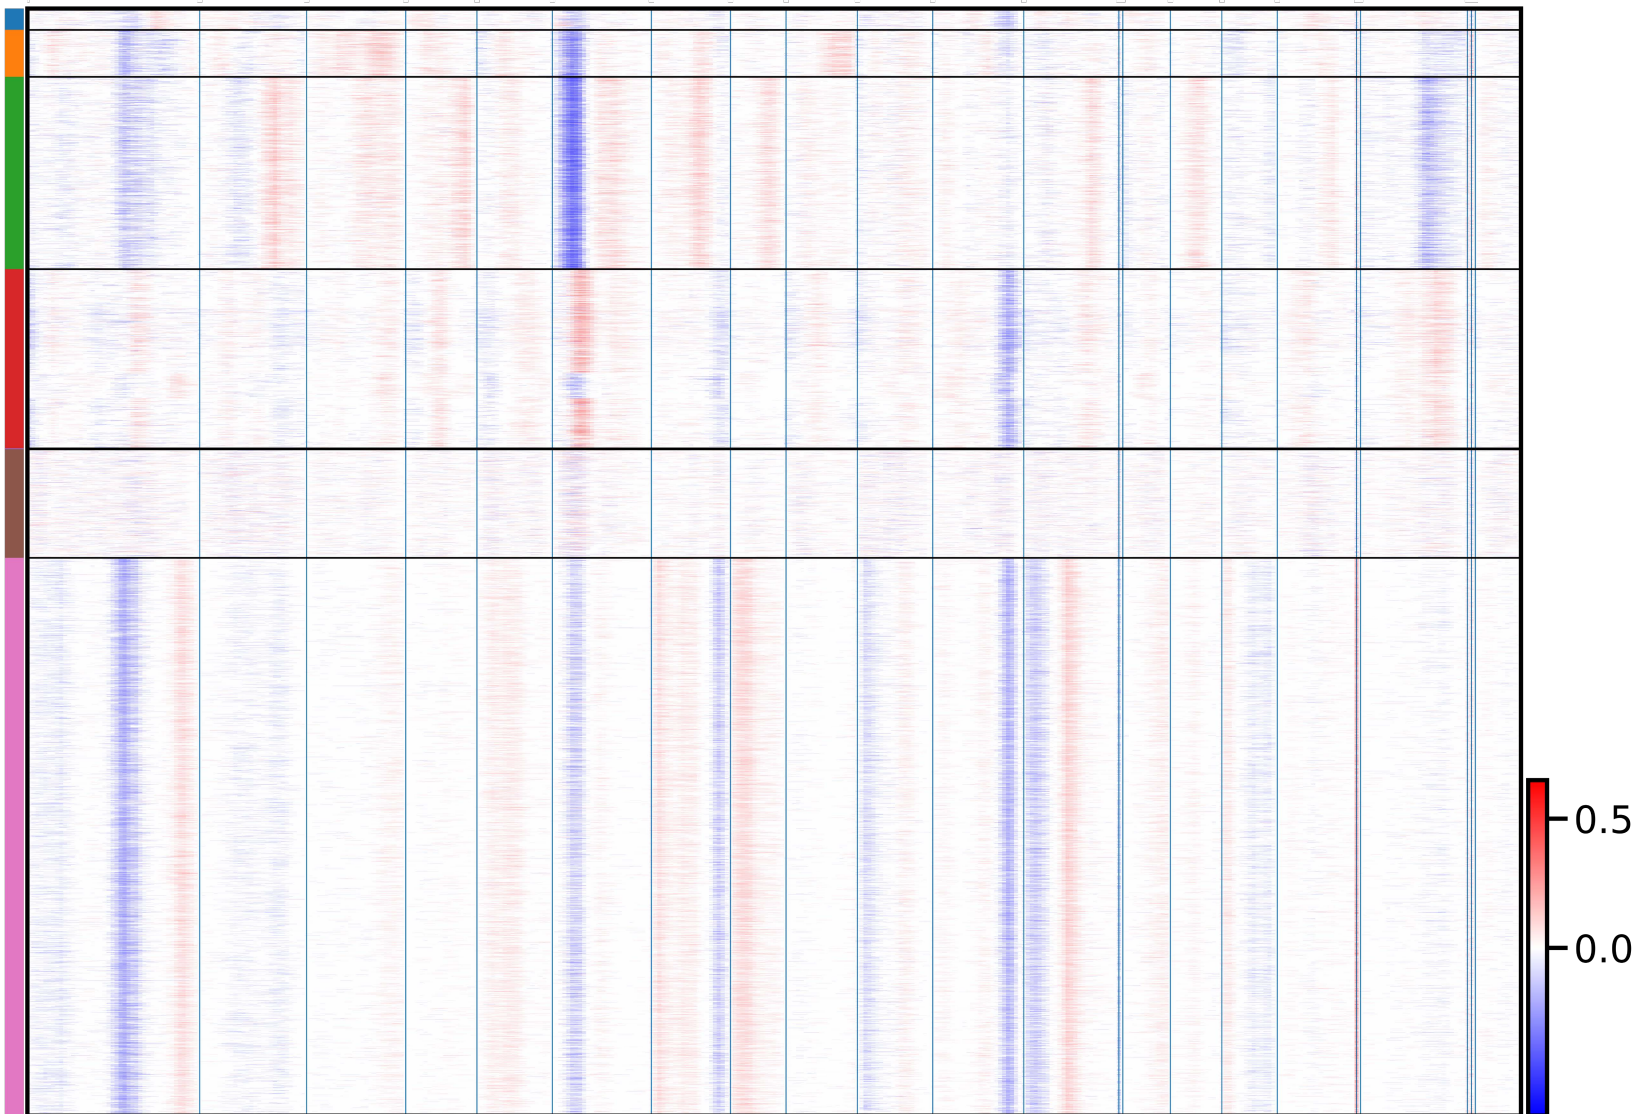









major\_celltype

Malignant

T\_cells  
Fibroblasts  
NK cells  
Myeloid cells

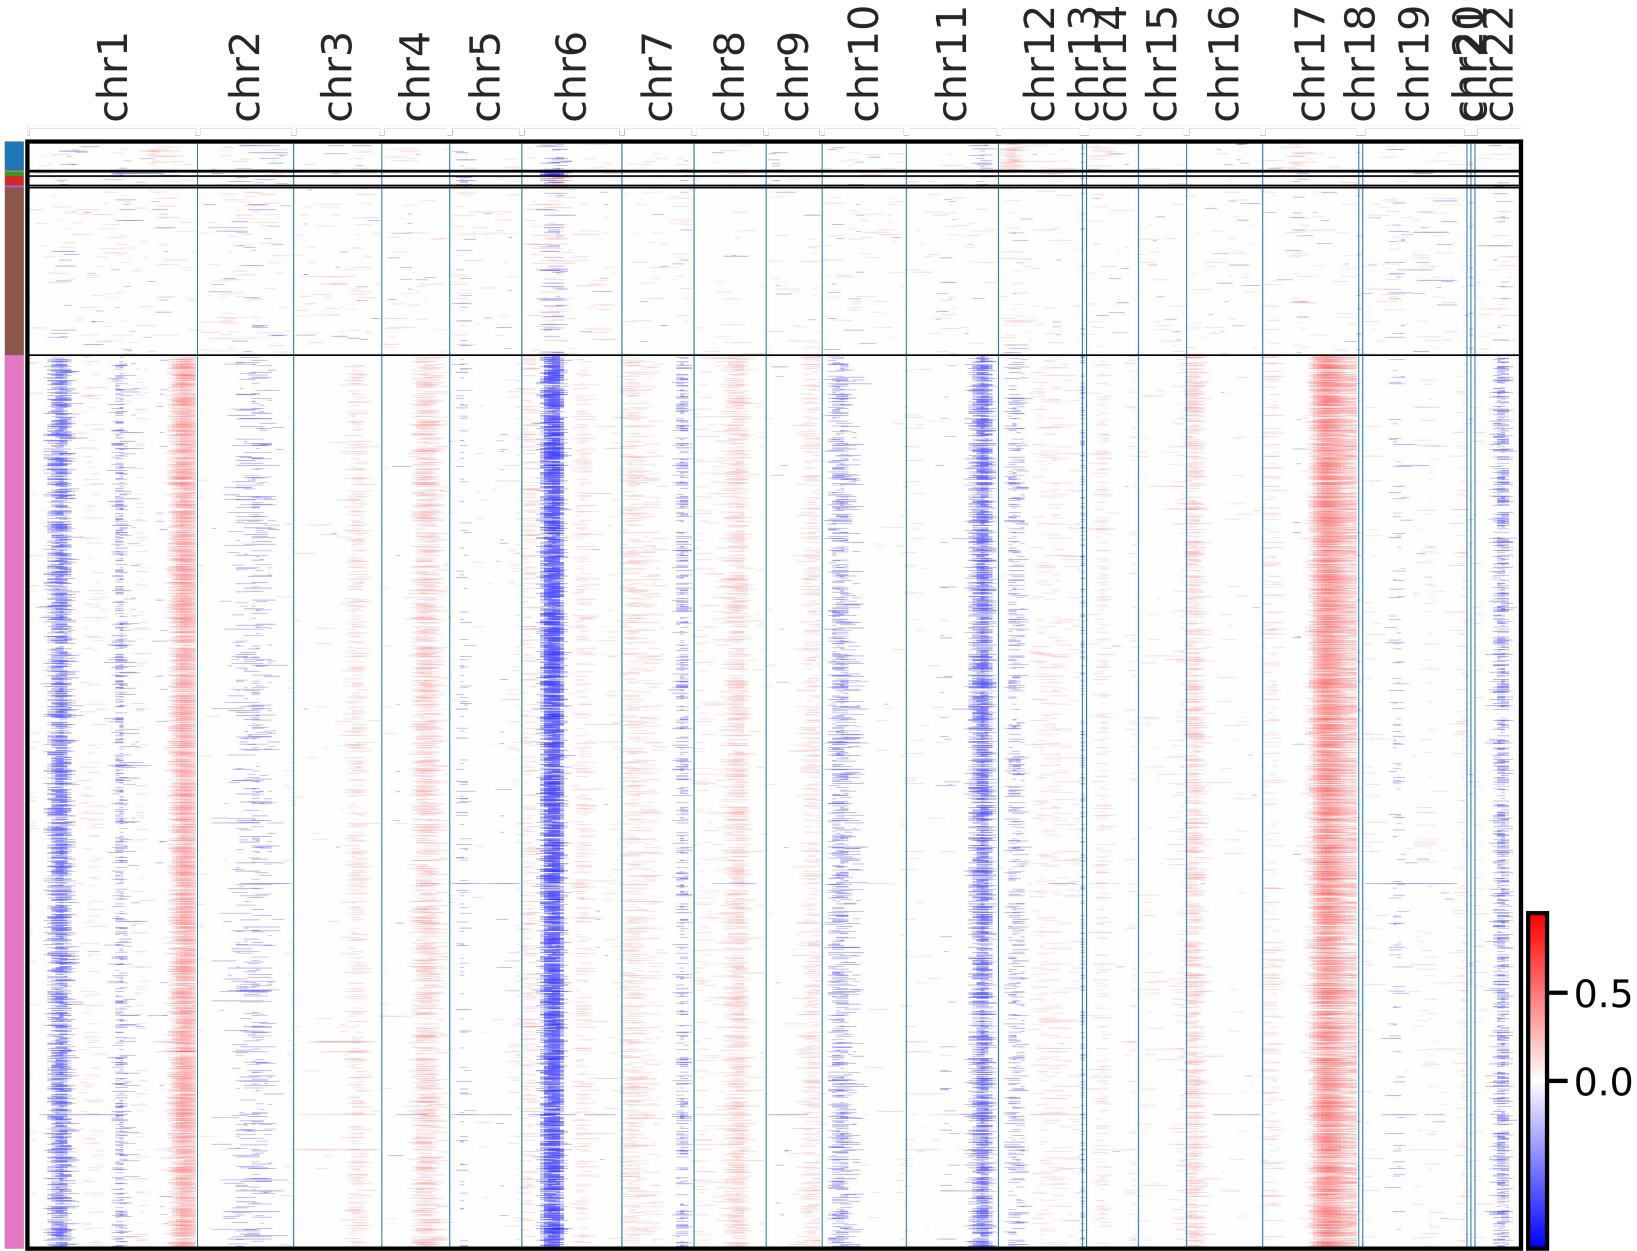

Metastasis 10

chr1 chr2 chr3 chr4 chr5 chr6 chr7 chr8 chr9 chr10 chr11 chr12 chr13 chr14 chr15 chr16 chr17 chr18 chr19 chr20

NK cells  
Fibroblasts  
Myeloids  
B\_cells  
T\_cells  
major\_celltype  
Malignant

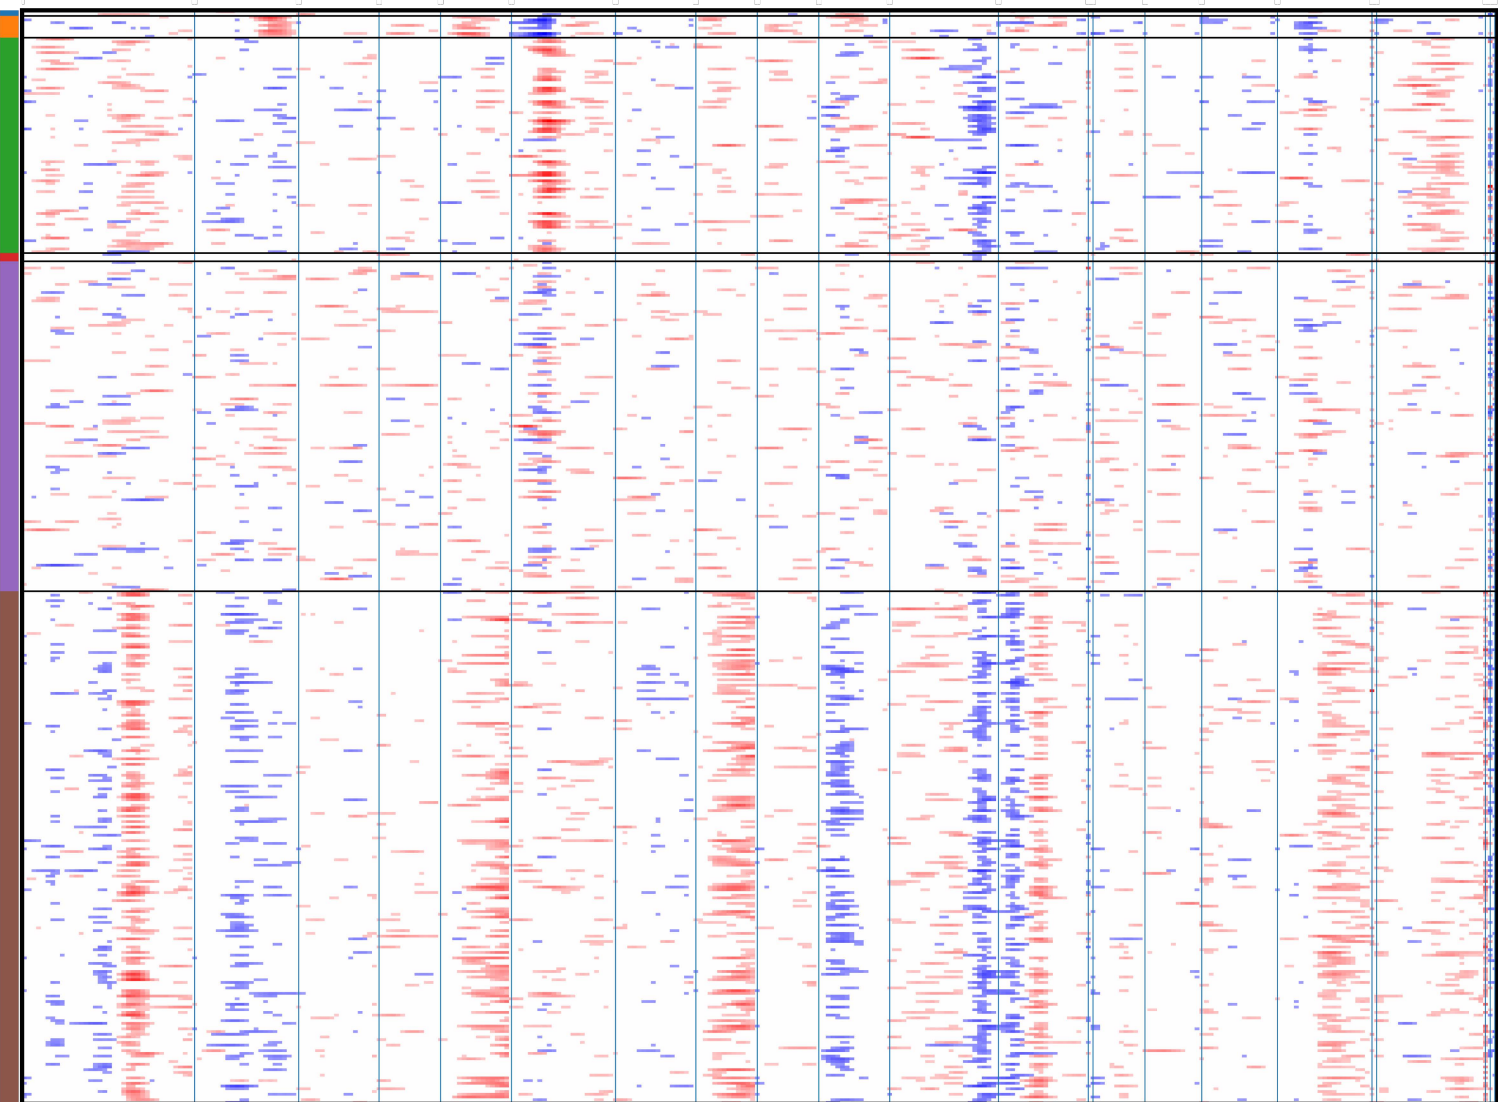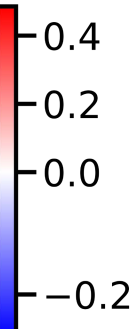



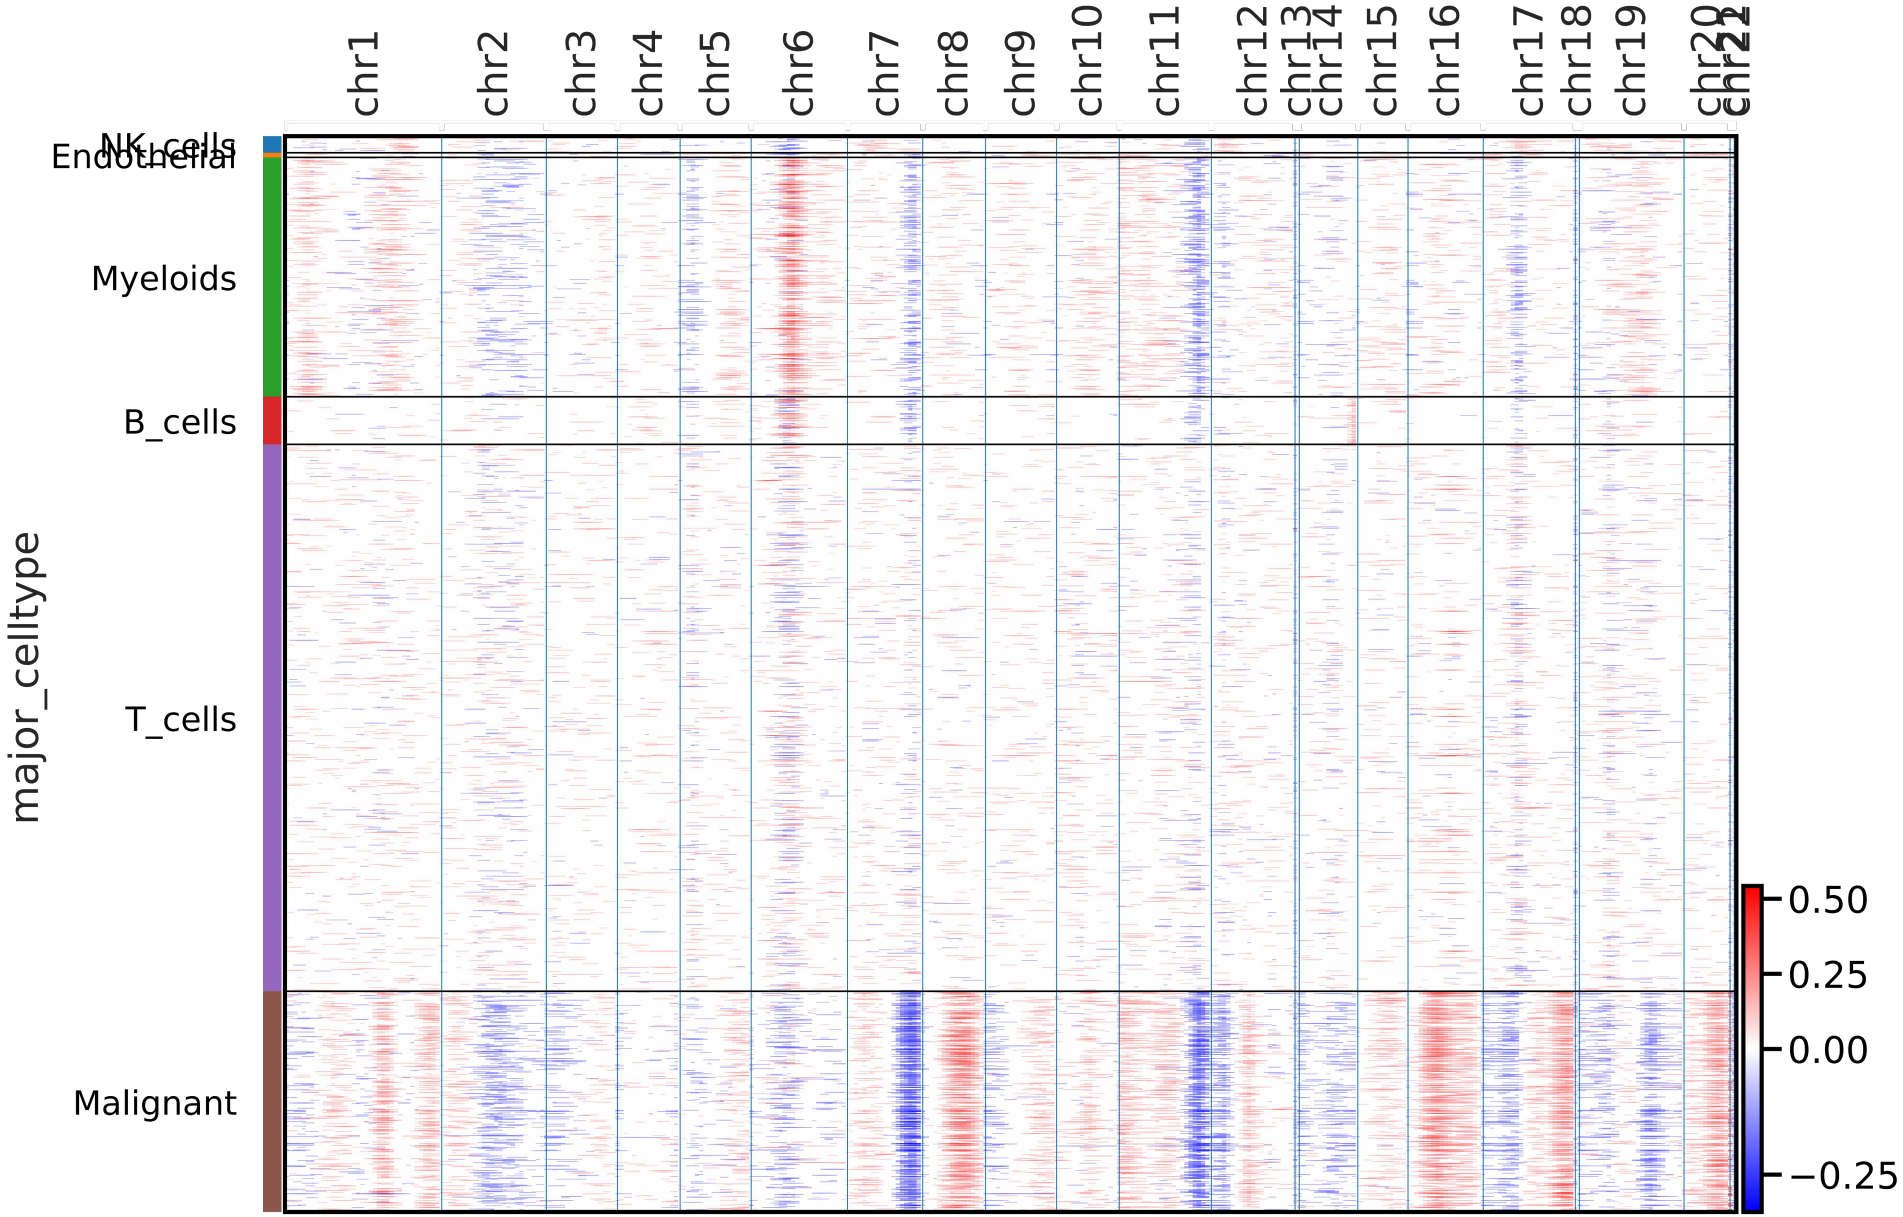

Supplement: Supplementary file [file media-4.pdf]
